# Supplementary material
Source: publisher figshare collection journal article supplement (https://gsapubs.figshare.com/articles/dataset/_/16942693)
Supplement: Supplementary file 1 [file 1]

## Sheet: DR1-WR + Isocon data
Unit	Sample	@' ME	@' TE	Category	Rock Type	Distance	Lat (dec deg)	Long (dec deg)	Lat (UTM Z 23N)	Long (UTM Z 23N)	SiO2	Al2O3	Fe2O3	CaO	MgO	Na2O	K2O	Cr2O3	TiO2	MnO	P2O5	SrO	BaO	LOI	H2O+ (calc)	Total	Ba	Ce	Cr	Cs	Dy	Er	Eu	Ga	Gd	Hf	Ho	La	Lu	Nb	Nd	Ni	Pr	Rb	Sc	Sm	Sn	Sr	Ta
Eriksfjord	KS19-15-QT 3.4	ALS	ALS	D1Fenite	EF	450	61.0345	-45.3974	478531	6.7667e+06	98.3	0.24	0.21	0.04	0.02	0.16	0.11	b.d.	0.01	0.01	b.d.	b.d.	b.d.	0.16	0.183295	99.26	11.7	9.7	b.d.	0.02	0.97	0.56	0.16	0.6	0.98	1	0.2	4.7	0.08	9.9	3.9	na	0.97	3	na	0.8	1	13	0.9
Eriksfjord	KS19-15-QT 3.5	ALS	ALS	D1Fenite	EF	450	61.0346	-45.3975	478525	6.7667e+06	98.6	0.66	0.14	0.01	0.01	0.22	0.31	b.d.	0.04	0.01	b.d.	b.d.	0.01	0.15	0.166282	100.16	60.5	21.2	b.d.	0.01	1.99	1.37	0.43	0.9	2.13	4.9	0.4	12.1	0.17	22.5	11.6	na	3.08	5.9	na	2.37	1	17	1.7
Eriksfjord	KS19-15-QT 3.6	ALS	ALS	D1Fenite	EF	450	61.0346	-45.3976	478519	6.7667e+06	98.9	0.47	0.13	0.01	0.01	0.18	0.23	b.d.	0.02	b.d.	b.d.	b.d.	0.01	0.29	0.304152	100.25	71.8	4.2	b.d.	0.02	0.39	0.31	0.14	0.5	0.63	1.5	0.08	4.3	0.04	3.6	3.4	na	0.81	5.4	na	0.64	1	53.4	0.6
Eriksfjord	KSL 15-1a	BVC	ALS	D1Fenite	EF	1130	61.0361	-45.4103	477835	6.76688e+06	96.49	1.44	0.24	0.09	0.04	0.52	0.58	b.d.	0.06	b.d.	0.02	na	na	0.4	0.425173	99.9052	66.7	6.3	10	0.02	0.68	0.45	0.12	1.6	0.57	3	0.13	6.1	0.08	7.6	5.6	na	1.37	11	na	0.83	1	33.1	0.6
Eriksfjord	KS19-15-QT 2.1	ALS	ALS	D1Fenite	EF	1210	61.0309	-45.4086	477925	6.76629e+06	98.5	1.09	0.14	0.01	0.01	0.06	0.88	b.d.	0.03	b.d.	b.d.	b.d.	b.d.	0.2	0.215154	100.92	26.7	6	b.d.	b.d.	0.79	0.49	0.16	0.8	0.83	0.7	0.14	3.7	0.07	2	3.3	na	0.84	8.8	na	0.65	b.d.	4.3	0.6
Eriksfjord	KS19-15-QT 2.2	ALS	ALS	D1Fenite	EF	1210	61.0308	-45.4092	477892	6.76629e+06	98.1	0.54	0.16	b.d.	0.01	0.08	0.38	b.d.	0.04	b.d.	b.d.	b.d.	b.d.	0.3	0.317158	99.61	24.5	5.7	b.d.	0.01	1.25	0.89	0.2	0.5	1.36	2.4	0.25	4.9	0.1	2.8	4.6	na	1.12	4.7	na	0.81	1	6	0.6
Eriksfjord	KS19-15-QT 2.3	ALS	ALS	D1Fenite	EF	1210	61.0309	-45.4092	477889	6.76629e+06	99.6	0.3	0.1	b.d.	0.01	0.09	0.16	b.d.	0.02	b.d.	b.d.	b.d.	b.d.	0.25	0.261146	100.53	14.7	4.3	b.d.	0.01	0.95	0.49	0.18	0.5	1.15	0.7	0.16	3.3	0.05	1.9	3.4	na	0.76	2.1	na	0.8	1	3.1	0.5
Eriksfjord	KS19-15-QT 2.9	ALS	ALS	D1Fenite	EF	1210	61.0312	-45.4094	477881	6.76633e+06	98.5	0.64	0.14	0.01	0.01	0.44	0.01	b.d.	0.02	b.d.	b.d.	b.d.	b.d.	0.19	0.205154	99.96	2.9	3.7	b.d.	0.01	1	0.63	0.15	0.9	0.89	1.4	0.17	3.3	0.06	2.2	3.7	na	0.8	0.3	na	0.73	b.d.	7.2	0.4
Eriksfjord	KS19-15-QT 2.10	ALS	ALS	D1Fenite	EF	1210	61.0311	-45.4094	477878	6.76633e+06	98.5	0.79	0.16	0.02	0.02	0.23	0.48	b.d.	0.03	b.d.	b.d.	b.d.	b.d.	0.21	0.227158	100.44	10.1	5.2	10	0.01	1.29	0.67	0.25	0.9	1.49	1.5	0.23	4.2	0.07	3.8	4.7	na	1.11	7.1	na	1.18	1	4.5	0.6
Eriksfjord	KSL T3-04a	ALS	ALS	D1Fenite	EF	1310	61.0342	-45.4131	477683	6.76666e+06	89.91	4.6	0.7	0.05	0.03	0.23	3.91	b.d.	0.15	b.d.	0.03	na	na	0.3	0.371259	99.9813	66.4	46	b.d.	0.11	2.02	1.15	0.43	5.1	2.38	5	0.38	18.5	0.19	10.3	16.3	na	4.06	48.3	na	3.22	1	37.4	0.8
Eriksfjord	KS19-6-QT 1.1	ALS	ALS	D1Fenite	EF	1405	61.03	-45.4125	477713	6.7662e+06	98.8	0.23	0.34	b.d.	0.01	0.12	0.04	b.d.	0.01	b.d.	b.d.	b.d.	b.d.	0.26	0.295192	99.81	11	8.6	10	0.05	0.64	0.42	0.18	0.2	0.9	0.9	0.12	3.6	0.05	2.7	3.6	na	0.83	1.1	na	0.81	1	6.2	0.8
Eriksfjord	KS19-6-QT 1.2	ALS	ALS	D1Fenite	EF	1405	61.0299	-45.4124	477715	6.76618e+06	99.4	0.16	0.25	b.d.	0.01	0.1	0.08	b.d.	0.01	b.d.	b.d.	b.d.	b.d.	0.17	0.196175	100.18	28.3	6	10	b.d.	0.49	0.35	0.08	0.3	0.38	0.7	0.11	1.4	0.05	3.4	1.3	na	0.31	1.3	na	0.37	1	8.5	0.6
Eriksfjord	KS19-6-QT 1.3	ALS	ALS	D1Fenite	EF	1405	61.0298	-45.4122	477725	6.76618e+06	99.7	0.22	0.38	0.01	0.01	0.2	0.12	b.d.	0.01	0.01	b.d.	b.d.	b.d.	0.18	0.220327	100.84	14.1	3	10	0.01	0.32	0.22	0.1	0.2	0.47	0.7	0.07	2.5	0.03	2.5	2.7	na	0.62	1.9	na	0.59	1	3.4	0.5
Eriksfjord	KS19-14-QT 1.1	ALS	ALS	D1Fenite	EF	2105	61.0258	-45.4232	477127	6.76573e+06	97.4	0.86	0.13	b.d.	0.01	0.1	0.67	b.d.	0.05	b.d.	b.d.	b.d.	0.01	0.03	0.0441521	99.26	52.1	14	b.d.	0.02	1.96	1.14	0.39	0.7	1.8	3.9	0.41	6.5	0.17	3.5	10.2	na	2.21	9.3	na	1.98	1	11.1	0.6
Eriksfjord	KS19-14-QT 1.2	ALS	ALS	D1Fenite	EF	2105	61.0259	-45.4229	477144	6.76574e+06	99.7	0.73	0.15	b.d.	0.01	0.05	0.6	b.d.	0.03	b.d.	b.d.	b.d.	b.d.	0.13	0.146156	101.4	42.8	15	b.d.	0.02	1.73	0.96	0.41	0.5	1.76	1.6	0.3	8.1	0.12	2.3	12.1	na	2.71	8.5	na	2.27	1	6.5	0.6
Eriksfjord	KS19-14-QT 1.3	ALS	ALS	D1Fenite	EF	2105	61.0259	-45.423	477139	6.76574e+06	98.8	0.4	0.24	b.d.	0.01	0.1	0.35	b.d.	0.03	b.d.	b.d.	b.d.	0.01	0.18	0.205173	100.12	43.1	25.6	10	0.01	0.99	0.72	0.21	0.4	0.78	3	0.2	3.7	0.13	5.8	5.4	na	1.27	5.5	na	1.04	1	11.2	0.4
Eriksfjord	KS19-10-QT 3.1	ALS	ALS	D1Fenite	EF	2440	61.0247	-45.4288	476824	6.76561e+06	100	0.31	0.08	b.d.	0.01	0.05	0.22	b.d.	0.03	b.d.	b.d.	b.d.	b.d.	0.27	0.279143	100.97	36.6	12.3	b.d.	0.05	1.33	0.62	0.41	0.5	1.88	0.8	0.21	8.6	0.08	2	10.6	na	2.39	3.4	na	2.35	1	3.5	0.8
Eriksfjord	KS19-10-QT 3.2	ALS	ALS	D1Fenite	EF	2440	61.0247	-45.4291	476808	6.76561e+06	98.2	0.51	0.2	b.d.	0.01	0.04	0.39	b.d.	0.04	b.d.	b.d.	b.d.	0.01	0.26	0.281165	99.66	63.2	19	b.d.	0.05	2.2	1.09	0.66	0.7	2.88	1.4	0.36	9.4	0.1	3.6	14	na	2.84	6.4	na	3.34	1	5.2	0.5
Eriksfjord	KS19-10-QT 3.3	ALS	ALS	D1Fenite	EF	2440	61.0248	-45.4291	476811	6.76563e+06	99.8	0.27	0.06	b.d.	0.01	0.16	0.02	b.d.	0.03	b.d.	b.d.	b.d.	b.d.	0.27	0.277139	100.62	14.6	15.6	b.d.	0.02	1.63	0.76	0.54	0.4	2.32	0.9	0.27	9.3	0.09	2.3	14.1	na	3.04	0.7	na	2.97	1	6.7	0.6
Eriksfjord	KS19-3-8c	ALS	ALS	D2Fenite	EF	1280	61.0337	-45.4131	477681	6.76661e+06	97.2	1.36	0.29	b.d.	0.01	0.64	0.41	b.d.	0.07	0.03	b.d.	0.01	b.d.	0.31	0.345821	100.33	18.2	55.3	10	0.11	3.98	3.15	0.29	2.8	3.07	6.8	0.85	27	0.49	80.5	19.2	na	5.55	34.3	na	3.78	3	8.3	4.8
Eriksfjord	KS19-3-8d	ALS	ALS	D2Fenite	EF	1280	61.0337	-45.4131	477681	6.76661e+06	95.2	1.9	0.61	0.02	0.02	1.11	0.38	b.d.	0.24	0.07	<0.01	0.01	0.01	0.41	0.486903	99.98	72.4	66.7	10	0.16	15.8	13.85	0.6	7.4	7.6	19.1	3.58	21	2.02	231	21.8	na	5.74	31.2	na	5.97	12	17.3	15.1
Eriksfjord	KS19-10-QT 2.1	ALS	ALS	D2Fenite	EF	1630	61.032	-45.4176	477436	6.76643e+06	99.9	0.37	0.1	b.d.	0.01	0.08	0.23	b.d.	0.02	b.d.	b.d.	b.d.	b.d.	0.15	0.161146	100.86	15.9	4.4	10	b.d.	1.03	0.63	0.21	0.2	1.27	1.8	0.18	3.6	0.07	1.7	3.4	na	0.84	3	na	0.98	1	4.7	0.6
Eriksfjord	KS19-10-QT 2.2	ALS	ALS	D2Fenite	EF	1630	61.0321	-45.4177	477429	6.76644e+06	99.8	0.22	0.09	b.d.	0.01	0.09	0.06	b.d.	0.01	b.d.	b.d.	b.d.	b.d.	0.19	0.200145	100.47	7.9	3.7	b.d.	0.02	0.63	0.38	0.16	0.3	0.85	1.3	0.11	3.2	0.04	1.4	4.1	na	0.9	1	na	0.9	1	3	0.6
Eriksfjord	KS19-10-QT 2.3	ALS	ALS	D2Fenite	EF	1630	61.0322	-45.4178	477424	6.76645e+06	98.4	0.26	0.11	b.d.	0.01	0.05	0.16	b.d.	0.03	b.d.	b.d.	b.d.	b.d.	0.33	0.342148	99.35	22.7	5.2	b.d.	0.01	2.33	1.49	0.35	0.2	2.52	1.6	0.47	5.2	0.16	2.8	8	na	1.61	2.4	na	1.64	1	3.9	0.8
Eriksfjord	KS19-18-QT 1.1	ALS	ALS	D3Fenite	EF	215	61.0258	-45.387	479088	6.76573e+06	97	0.82	0.55	0.11	0.08	0.32	0.46	b.d.	0.05	0.06	0.02	b.d.	0.01	0.21	0.278636	99.69	96.2	124	b.d.	0.03	4.83	2.36	1.31	1.6	6.67	4.5	0.82	77.1	0.27	192	56	na	14.9	8.9	na	9.21	1	39.1	3.1
Eriksfjord	KS19-18-QT 1.2	ALS	ALS	D3Fenite	EF	215	61.0259	-45.387	479085	6.76573e+06	97.7	0.7	0.58	0.11	0.07	0.37	0.33	b.d.	0.04	0.05	0.01	b.d.	0.01	0.17	0.239386	100.14	60.7	29.3	10	0.1	2.67	1.75	0.49	1.2	2.78	3.7	0.52	17.4	0.21	39.4	14.6	na	3.56	7.2	na	2.88	1	34.4	1.3
Eriksfjord	KS19-18-QT 1.3	ALS	ALS	D3Fenite	EF	215	61.026	-45.387	479086	6.76574e+06	98.4	0.72	0.15	0.01	0.02	0.15	0.44	b.d.	0.03	0.01	0.01	b.d.	b.d.	0.16	0.177284	100.1	35.3	13.8	b.d.	0.02	1.08	0.67	0.23	0.8	1.15	2.1	0.2	5.2	0.09	9.5	6	na	1.45	8.2	na	1.21	1	7.4	0.8
Eriksfjord	KSL 14-3a	BVC	ALS	Fenite	EF	98	61.0275	-45.3864	479120	6.76591e+06	94.56	1.94	0.73	0.29	0.04	0.75	0.85	na	0.16	0.02	0.02	na	na	0.5	0.577648	99.9376	149	41.3	b.d.	0.02	1.62	0.77	0.61	3.3	2.26	1.9	0.23	19.5	0.15	26.4	19	na	4.8	13.2	na	3.13	2	181.5	2.3
Eriksfjord	KSL 2-3c	BVC	ALS	Fenite	EF	130	61.0403	-45.3928	478783	6.76734e+06	82.74	6.56	0.83	1.81	1.51	0.77	5.08	na	0.14	0.06	0.06	na	na	0.3	0.396688	99.9567	287	52.3	b.d.	0.16	5.35	2.88	1.16	6.9	5.95	3	0.94	23.4	0.37	9.9	29.2	na	6.68	74.7	na	5.84	1	99.8	0.7
Eriksfjord	LRS19.42	BVC	ALS	Fenite	EF	148	61.042	-45.3936	478740	6.76752e+06	84.35	5.87	0.74	1.6	1.11	1.68	4.03	na	0.17	0.05	0.02	na	na	0.21	0.295416	99.9154	284	47.7	b.d.	0.09	4.99	2.94	0.93	7.7	5.22	3.9	0.95	22.9	0.47	21.9	27.7	na	6.43	67.9	na	5.26	1	104	1.6
Eriksfjord	KSL 6-1b	BVC	ALS	Fenite	EF	150	61.0339	-45.3958	478614	6.76663e+06	90.93	3.21	0.62	0.9	0.63	0.37	2.56	na	0.12	0.02	0.02	na	na	0.5	0.566627	99.9466	227	39.3	10	0.12	3.8	2.2	0.73	3	3.97	2.7	0.71	18.1	0.29	19.9	21.2	na	4.93	41.5	na	4.04	1	90.1	1.3
Eriksfjord	KSL 1-3a	BVC	ALS	Fenite	EF	156	61.0433	-45.3933	478755	6.76768e+06	84.05	7.26	0.63	0.34	0.15	0.8	5.74	na	0.18	b.d.	0.15	na	na	0.6	0.664246	99.9642	414	50.6	b.d.	0.03	5.55	2.08	1.45	8.8	7.54	0.5	0.87	25.2	0.13	14.9	32.6	na	7	79.9	na	7.15	1	137	0.6
Eriksfjord	KSL 1-3b	BVC	ALS	Fenite	EF	156	61.0433	-45.3933	478755	6.76768e+06	89.7	4.49	0.49	0.54	0.29	0.5	3.52	na	0.13	0.02	0.03	na	na	0.2	0.253603	99.9636	268.5	23.2	na	na	na	na	na	na	na	na	na	18.5	na	10.7	12.7	3.6	na	na	b.d.	b.d.	na	164	na
Eriksfjord	KSL 6-3b	BVC	ALS	Fenite	EF	156	61.0433	-45.3933	478755	6.76768e+06	95.32	1.19	1.44	0.11	0.02	0.62	0.49	b.d.	0.04	0.09	0.05	na	na	0.3	0.464569	99.8346	617	452	b.d.	0.03	6.72	2.64	3.41	3.4	13.25	2.4	1.03	263	0.24	42.5	174.5	na	48	11.7	na	22	1	71.1	1.3
Eriksfjord	KSL 6-8b	BVC	ALS	Fenite	EF	330	61.0411	-45.3969	478559	6.76743e+06	96.59	1.38	0.28	0.04	b.d.	0.29	0.84	b.d.	0.1	0.01	0.02	na	na	0.3	0.330308	99.8803	321	18.4	b.d.	0.24	1.94	1.23	0.28	1.8	1.72	2.3	0.34	5.9	0.1	33.5	8	na	1.8	25.9	na	1.78	2	34.2	1.7
Eriksfjord	KS19-3-1a	ALS	ALS	Fenite	EF	420	61.0383	-45.3974	478535	6.76711e+06	95.6	1.1	0.98	0.16	0.06	0.46	0.6	b.d.	0.1	0.78	0.06	0.02	0.07	0.35	0.624107	100.34	576	202	10	0.62	14.8	8.54	2.62	3.5	15.4	7.9	2.71	86.7	0.91	92.2	94.3	na	23.5	28.9	na	18.45	3	122	4.2
Eriksfjord	KS19-18-2	ALS	ALS	Fenite	EF	430	61.0309	-45.3946	478679	6.76629e+06	97	1.49	0.54	0.03	0.01	0.29	1.15	b.d.	0.04	0.01	0.01	0.05	0.05	0.28	0.336357	100.95	401	22.7	b.d.	0.03	0.92	0.41	0.47	1.5	1.62	1.8	0.16	13.4	0.05	7.1	16.9	na	4.15	14.6	na	2.8	1	329	0.7
Eriksfjord	KSL 8-2c	BVC	ALS	Fenite	EF	446	61.0303	-45.3947	478672	6.76622e+06	93.02	0.3	4.34	0.09	0.01	1.58	0.19	b.d.	0.02	0.04	0.02	na	na	0.3	0.743837	100.354	59.1	58.4	b.d.	b.d.	2.76	1.56	1.09	0.9	4.32	1.3	0.48	34.3	0.27	12.3	35.6	na	8.29	3.5	na	5.96	1	36.7	0.4
Eriksfjord	KSL 10-4	BVC	ALS	Fenite	EF	2570	61.0269	-45.4322	476643	6.76587e+06	92.11	0.21	7.16	0.005	b.d.	0.01	0.07	b.d.	0.06	0.05	0.01	na	na	0.2	0.928622	100.614	32.6	4.9	10	0.04	1.21	0.68	0.18	0.3	1.04	1.1	0.24	4	0.09	74.9	5.1	na	1.04	1.6	na	1.04	1	3.2	0.5
Eriksfjord	KS19-3-5	ALS	ALS	Protolith	EFU	850	61.036	-45.4053	478105	6.76687e+06	98.5	0.61	0.16	0.01	0.02	0.15	0.33	b.d.	0.04	b.d.	b.d.	0.01	b.d.	0.19	0.207158	100.02	29.4	5.2	b.d.	0.02	0.48	0.33	0.12	0.5	0.52	2.8	0.12	3.7	0.06	3.3	3.1	na	0.86	4.2	na	0.63	1	3.9	0.4
Eriksfjord	KS19-3-6	ALS	ALS	Protolith	EFU	1065	61.0354	-45.409	477903	6.7668e+06	97.1	1.05	0.26	0.005	0.01	0.17	0.72	b.d.	0.06	b.d.	b.d.	0.01	b.d.	0.26	0.287177	99.64	34.7	6.8	10	0.03	0.77	0.55	0.18	0.9	0.76	3.2	0.17	5.3	0.09	4.9	4.7	na	1.19	10.6	na	0.97	1	4	0.6
Eriksfjord	KS19-18-12	ALS	ALS	Protolith	EFU	1190	61.0332	-45.4085	477929	6.76655e+06	98.8	0.53	0.09	0.005	0.01	0.11	0.33	b.d.	0.03	b.d.	b.d.	b.d.	b.d.	0.17	0.180145	100.07	20.7	7.9	b.d.	0.02	0.43	0.29	0.11	0.5	0.69	1.1	0.09	4.8	0.03	2.3	4.4	na	1.05	4	na	0.81	1	3.2	0.8
Eriksfjord	KS19-18-11	ALS	ALS	Protolith	EFU	1195	61.0315	-45.4094	477882	6.76636e+06	99.1	0.43	0.11	0.24	0.01	0.13	0.23	b.d.	0.02	b.d.	0.17	0.01	b.d.	0.16	0.172148	100.61	16.4	5.5	b.d.	0.01	1.57	0.89	0.44	0.4	2.69	2	0.26	4.5	0.09	2.5	6.2	na	1.38	3.4	na	1.88	1	23.9	0.5
Eriksfjord	KS19-3-7	ALS	ALS	Protolith	EFU	1210	61.0343	-45.4114	477776	6.76668e+06	99	1.03	0.16	0.005	0.02	0.24	0.55	b.d.	0.02	b.d.	b.d.	0.01	b.d.	0.21	0.227158	101.24	34	5.7	10	0.06	0.82	0.51	0.16	1.2	0.74	1	0.16	4.3	0.06	2.5	5.3	na	1.18	6.8	na	0.92	1	6.4	0.7
Eriksfjord	KS19-18-9	ALS	ALS	Protolith	EFU	1340	61.0288	-45.4103	477827	6.76606e+06	96.8	1.35	0.32	0.01	0.03	0.22	0.87	b.d.	0.05	b.d.	b.d.	0.01	0.01	0.13	0.163188	99.8	56	7.7	10	0.05	1.81	1.03	0.24	1.3	1.57	2.7	0.36	3.3	0.12	5.1	3.7	na	0.84	12.5	na	0.94	1	17.1	0.7
Eriksfjord	KS19-18-8	ALS	ALS	Protolith	EFU	1480	61.0283	-45.4127	477696	6.76601e+06	98.9	0.49	0.26	0.005	0.02	0.04	0.4	b.d.	0.03	0.01	b.d.	0.01	b.d.	0.41	0.438304	100.57	32.4	7.4	10	0.02	0.79	0.6	0.2	0.4	0.74	3.8	0.18	2.1	0.1	9	2.7	na	0.59	5.5	na	0.75	1	5	0.8
Eriksfjord	KSL 15-2	BVC	ALS	Protolith	EFU	1560	61.0317	-45.4164	477502	6.76639e+06	98.57	0.39	0.08	0.005	0.01	0.09	0.19	b.d.	0.02	b.d.	0.01	na	na	0.5	0.509143	99.8741	18.5	12	b.d.	0.02	1.64	1.16	0.27	0.2	1.79	1	0.34	4.7	0.14	1.7	5.8	na	1.22	3.4	na	1.16	1	6	0.7
Eriksfjord	KSL 15-4	BVC	ALS	Protolith	EFU	1560	61.0281	-45.4142	477619	6.76598e+06	97.86	0.63	0.28	0.005	b.d.	0.07	0.42	b.d.	0.01	b.d.	0.01	na	na	0.4	0.42918	99.7142	30.7	3.3	b.d.	b.d.	0.67	0.47	0.11	0.4	0.77	0.7	0.12	1.7	0.11	3.2	2.1	na	0.43	5.8	na	0.54	b.d.	2	2.2
Eriksfjord	KS19-3-9	ALS	ALS	Protolith	EFU	1560	61.0324	-45.4168	477482	6.76647e+06	98.9	0.15	0.08	0.005	0.01	0.06	0.03	b.d.	0.01	b.d.	b.d.	0.01	b.d.	0.29	0.299143	99.54	9	1.8	b.d.	0.01	0.47	0.35	0.07	b.d.	0.48	0.6	0.1	1.4	0.03	1.4	1.2	na	0.32	0.7	na	0.34	1	3.1	0.8
Eriksfjord	KSL 15-3a	BVC	ALS	Protolith	EFU	1580	61.0294	-45.4153	477560	6.76614e+06	98.11	0.52	0.22	0.01	0.01	0.21	0.26	b.d.	0.01	b.d.	0.02	na	na	0.5	0.523169	99.8932	14.2	2.4	b.d.	b.d.	0.5	0.39	0.13	0.4	0.7	0.9	0.11	2.4	0.05	2.8	5	na	0.88	3.8	na	0.66	b.d.	7.8	0.5
Eriksfjord	KS19-18-7	ALS	ALS	Protolith	EFU	1605	61.0278	-45.4148	477585	6.76595e+06	99	0.3	0.21	0.005	0.01	0.08	0.14	b.d.	0.02	0.01	b.d.	0.01	b.d.	0.35	0.373295	100.13	17.2	7.8	10	b.d.	0.8	0.56	0.12	0.3	0.83	0.8	0.16	3.1	0.1	3.9	3.7	na	1	2.3	na	0.86	1	3.9	0.8
Eriksfjord	KS19-3-10	ALS	ALS	Protolith	EFU	1790	61.0309	-45.4202	477294	6.7663e+06	99.6	0.22	0.12	0.005	0.01	0.08	0.07	b.d.	0.02	b.d.	0.01	b.d.	b.d.	0.26	0.27315	100.39	15.9	7.3	b.d.	0.01	0.61	0.33	0.13	0.1	0.72	0.9	0.11	2.7	0.04	1.8	2.8	na	0.73	1.2	na	0.59	1	7.1	0.6
Eriksfjord	KS19-18-5	ALS	ALS	Protolith	EFU	1930	61.0248	-45.4188	477367	6.76562e+06	98.9	0.59	0.21	0.03	0.03	0.19	0.33	b.d.	0.01	0.01	b.d.	0.01	b.d.	0.19	0.213295	100.5	13.1	6.9	b.d.	b.d.	0.33	0.27	0.07	0.9	0.31	1	0.07	1.9	0.04	3.3	2	na	0.49	4.6	na	0.38	1	7.9	0.6
Eriksfjord	KSL 10-3b	BVC	ALS	Protolith	EFU	2340	61.0292	-45.4294	476795	6.76611e+06	98.82	0.46	0.1	0.005	b.d.	0.08	0.28	b.d.	0.02	b.d.	0.01	na	na	0.1	0.111146	99.8861	22.8	6.6	b.d.	0.01	0.76	0.47	0.16	0.5	0.89	1	0.15	4	0.06	1.9	4.3	na	0.91	3.5	na	0.76	1	5.3	0.6
Illerfissalik	KSL 13-2a	BVC	STA	Intrusion	SY	-507	61.0389	-45.3808	479428	6.76718e+06	61.41	18.14	4.85	1.61	0.31	6.49	5.72	b.d.	0.95	0.08	0.06	na	na	0.3	0.803955	100.424	415	b.d.	na	na	na	na	na	na	na	na	na	b.d.	na	28	b.d.	b.d.	na	na	7	b.d.	na	113	na
Illerfissalik	KSL 4-4d	BVC	STA	Intrusion	SY	-410	61.0459	-45.3827	479332	6.76796e+06	60.28	11.69	6.89	7.93	3.32	6.93	1.41	b.d.	0.23	0.54	0.05	na	na	0.4	1.21209	100.482	105.9	164	na	na	na	na	na	na	na	na	na	67	na	43.6	70.2	12.9	na	na	b.d.	b.d.	na	377.2	na
Illerfissalik	KSL 7-3b	BVC	STA	Intrusion	SY	-328	61.0447	-45.3831	479311	6.76783e+06	55.4	15.26	10.76	4.36	1.05	5.7	4.76	b.d.	1.45	0.23	0.55	na	na	0.2	1.3299	100.85	655	b.d.	na	na	na	na	na	na	na	na	na	b.d.	na	113	b.d.	b.d.	na	na	20	b.d.	na	200	na
Illerfissalik	KSL 13-4a	BVC	STA	Intrusion	SY	-290	61.0342	-45.3831	479304	6.76665e+06	57.75	12.63	10.49	4.18	3.08	5.87	4.1	b.d.	0.14	0.39	0.32	na	na	0.34	1.47893	100.429	397.3	27.2	na	na	na	na	na	na	na	na	na	14.6	na	29.2	8.9	4.9	na	na	b.d.	8.9	na	110.8	na
Illerfissalik	GLC 17.6	BVC	STA	Intrusion	SY	-200	61.0339	-45.3862	479137	6.76662e+06	51.57	17.74	8.97	5.84	2.04	5.77	3.57	b.d.	1.97	0.18	0.99	na	na	0.8	1.73928	100.379	2946	b.d.	na	na	na	na	na	na	na	na	na	b.d.	na	54	b.d.	b.d.	na	na	16	b.d.	na	1051	na
Illerfissalik	KSL 14-5	BVC	STA	Intrusion	SY	-188	61.0422	-45.3872	479085	6.76755e+06	66.52	18.25	1.93	0.64	0.07	10.45	1.28	b.d.	0.13	0.07	0.03	na	na	0.5	0.709151	100.079	169	b.d.	na	na	na	na	na	na	na	na	na	b.d.	na	25	b.d.	b.d.	na	na	b.d.	b.d.	na	409	na
Illerfissalik	KSL 9-1	BVC	STA	Intrusion	SY	-89	61.0419	-45.3892	478979	6.76752e+06	57.93	12.38	10.18	7.38	0.81	6.14	3.08	b.d.	0.33	0.64	0.31	na	na	0.08	1.24426	100.424	382.2	498.2	na	na	na	na	na	na	na	na	na	196.4	na	141.1	237.4	b.d.	na	na	b.d.	b.d.	na	1977	na
Illerfissalik	KSL 9-2b	BVC	STA	Intrusion	SY	-58	61.0419	-45.3919	478830	6.76752e+06	53.19	23.69	3.62	8	0.93	5.89	1.67	b.d.	0.79	0.05	0.51	na	na	1.15	1.52396	99.864	1635	55.5	na	na	na	na	na	na	na	na	na	37	na	17.4	33.4	2.8	na	na	b.d.	b.d.	na	2104	na
Illerfissalik	KSL 14-1	BVC	STA	Intrusion	SY	-69	61.0347	-45.3903	478915	6.76672e+06	62.8	15.31	6.78	1.69	0.81	10.29	0.17	b.d.	0.83	0.14	0.35	na	na	0.7	1.41085	100.581	134	b.d.	na	na	na	na	na	na	na	na	na	b.d.	na	63	b.d.	b.d.	na	na	8	b.d.	na	90	na
@' = location; BVC - Bureau Veritas Canada, Vancouver; STA = St Andrews; ALS = ALS Geochemistry, Loughrea, Ireland
b.d. = below detection limit; na = not analysed
D1, D2 & D3 categories correspond to fenite at the contacts of different dykes of the Igaliku Dyke Swarm
sample used as reference for isocon analysis; fenite density used = 2.8, protolith density = 2.6
Standardisation Summary
MDL BVC			MAX ME	AVG ME	MAX TE	AVG TE					0.01	0.01	0.04	0.01	0.01	0.01	0.01	-	0.01	0.01	0.01	na	na	-5.1	-	-	5	na	na	na	na	na	na	na	na	na	na	na	na	5	na	20	na	na	1	na	na	2	na
Accuracy (Absolute difference; wt% ox or ppm)			0.89	0.12775							0.89	0.1225	0.0575	0.055	0.0625	0.055	0.0175	0.00625	0.0175	0	0						18	0	0	0	0	0	0	0	0	0	0	0	0	6.25	0	1.25	0	0	0.75	0	0	1.6	0
Accuracy (% relative to cert.)			0.0253623	0.0114216							0.0145591	0.00878136	0.00769746	0.00916667	0.0217014	0.013382	0.0135659	0.0125	0.0253623	0	0
2-sigma											0.165731	0.0806226	0.133041	0.011547	0.0191485	0.0258199	0.01	-	0.01	0	0.0163299						11.1952	na	na	na	na	na	na	na	na	na	na	na		7.54983	na	11	na	na	na	na	na	2.58199	na
RSD BVC			0.0255155	0.00568925							0.00137559	0.00286454	0.00883702	0.000971153	0.00325379	0.00318371	0.00382409	0.00812442	0.00706714	0	0.0255155						0.0119607													0.0505006		0.0116711						0.0040919
MDL STA																											6	3.9	na	na	na	na	na	na	na	na	na	3.9	na	0.1	7.6	1.5	na	na	1	8.1	na	3	na
Accuracy (Absolute difference; wt% ox or ppm)					26.5	2.89839																					26.5	12.85	0	0	0	0	0	0	0	0	0	6.2	0	0	15.45	0.5	0	0	0	4.05	0	8	0
Accuracy (% relative to cert.)					0.1875	0.0197314																					0.0197761	0.0313415	0	0	0	0	0	0	0	0	0	0.0344444	0	0	0.07725	0.0294118	0	0	0	0.15	0	0.0333333	0
2-sigma																											159.806	86.9741	na	na	na	na	na	na	na	na	na	19.5161	na	1.9799	na	10.4652	na	na	na	2.40416	na	3.11127	na
RSD STA					0.521026	0.0414486																					0.0608322	0.102843	0	0	0	0	0	0	0	0	0	0.0561454	0	0.0366648	0.00881249	0.299005	0	0	0	0.0523783	0	0.00670532	0
MDL ALS											0.01	0.01	0.01	0.01	0.01	0.01	0.01	0.002	0.01	0.01	0.01	0.01	0.01	0.01	-	0.01	0.5	0.1	10	0.01	0.05	0.03	0.02	0.1	0.05	0.1	0.01	0.1	0.01	0.1	0.1	na	0.02	0.2	na	0.03	1	0.1	0.1
Accuracy (Absolute difference; wt% ox or ppm)			0.6	0.0975	70	3.73758					0.6	0.1	0.13	0.025	0.005	0.025	0.075	0.0005	0.005	0.01	0	#DIV/0!	0				18.5	2.25	0	0.02	1.55	0.925	0.03	0	0.475	0.8	0.095	2.4	0.075	0.35	4.3	0.375	1.35	0.825	0	1	70	0.2	0.02
Accuracy (% relative to cert.; ME = OREAS102, TE = SY-4)			0.142857	0.0364074	0.222222	0.0478846					0.00911854	0.00806452	0.0159314	0.0126263	0.00222222	0.138889	0.0171233	0.125	0.0172414	0.142857	0	#DIV/0!	0				0.0544118	0.0184426	0	0.0133333	0.0851648	0.0651408	0.015	0	0.0339286	0.0720721	0.022093	0.0413793	0.0357143	0.0269231	0.0754386	0.025	0.0245455	0.0649606	0	0.125	0.0588235	0.222222	0.00769231
2-sigma											0.282843	0	0.0565685	0.0141421	0.0707107	0.0141421	0.0424264	0.00141421	0.0141421	0	0	#DIV/0!	0				21.2132	6.36396	0	0.141421	0.707107	0.353553	0.169706	1.13137	0.494975	0.848528	0.0141421	0.848528	0.0424264	0.141421	4.24264	0.777817	8.34386	0.212132	0	0	113.137	0	0.113137
RSD ALS (ME = OREAS102, TE = SY-4)			0.0456198	0.0100415	0.0883883	0.0202802					0.00216904	0	0.00352233	0.00361691	0.0157485	0.0456198	0.00492757	0.157135	0.0248108	0	0	#DIV/0!	0				0.0295861	0.0265719	0	0.0477775	0.0179014	0.0116877	0.0430725	0.0153302	0.0170976	0.0356524	0.00168159	0.00763065	0.0104757	0.00558978	0.0346056	0.026592	0.074036	0.00784222	0	0	0.0448957	0	0.0219258
Average Fenite											92.64	2.645	0.921429	0.438571	0.307692	0.639286	1.87714	-	0.0942857	0.0938462	0.0357143	0.035	0.035	0.312857	0.424908	100.069	271.129	83.9286	10	0.124167	4.38692	2.31	1.13692	3.41538	5.52692	2.92308	0.766154	45.0429	0.273077	38.0143	39.1643	3.6	10.4223	29.7	#DIV/0!	6.90077	1.30769	103.593	1.53846
Average I4											58.5389	16.1211	7.16333	4.62556	1.38	7.05889	2.86222	-	0.757778	0.257778	0.352222	#DIV/0!	#DIV/0!	0.496667	1.27249	100.39	759.933	186.225	#DIV/0!	#DIV/0!	#DIV/0!	#DIV/0!	#DIV/0!	#DIV/0!	#DIV/0!	#DIV/0!	#DIV/0!	78.75	#DIV/0!	57.1444	87.475	6.86667	#DIV/0!	#DIV/0!	12.75	8.9	#DIV/0!	714.667	#DIV/0!
Average Protolith											98.5307	0.583333	0.177333	0.0233333	0.0153846	0.128	0.343333	-	0.0246667	0.01	0.0383333	0.01	0.01	0.274667	0.293787	100.125	24.3333	6.28667	10	0.0236364	0.83	0.546667	0.167333	0.571429	0.946667	1.56667	0.166667	3.32667	0.0746667	3.30667	3.8	#DIV/0!	0.871333	4.82	#DIV/0!	0.812667	1	7.10667	0.753333
2-sigma I4											9.51713	7.60707	6.39856	5.71108	2.33574	3.83483	3.68312	#DIV/0!	1.27066	0.432409	0.614067	#DIV/0!
95% CI I4											3.10893	2.48497	2.0902	1.86562	0.76301	1.25271	1.20315	#DIV/0!	0.415082	0.141254	0.200595	#DIV/0!	#DIV/0!	0.218452
1-sigma Protolith Variability											0.762744	0.327298	0.0799524	0.060287	0.0077625	0.0644981	0.228838	-	0.0150555	0	0.0646271	0	-	0.129828	0.13136	0.457241	12.0519	2.51903	0	0.0168954	0.464466	0.27299	0.0942236	0.362531	0.614732	1.04585	0.0874779	1.25554	0.0348193	1.91925	1.47551	-	0.313001	3.18573	-	0.369603	0	5.85558	0.418956
2-sigma Protolith Variability											1.52549	0.654595	0.159905	0.120574	0.015525	0.128996	0.457675	-	0.0301109	0	0.129254	0	-	0.259655	0.262721	0.914482	24.1038	5.03806	0	0.0337908	0.928932	0.545981	0.188447	0.725062	1.22946	2.09171	0.174956	2.51108	0.0696385	3.8385	2.95103	-	0.626002	6.37145	-	0.739207	0	11.7112	0.837911
MAX (2sigma + 3-9)											100.425	0.804595	0.239905	0.120574	0.025525	0.188996	0.487675	-	0.0401109	#VALUE!	0.129254	0.01	-	0.549655	0.561864	100.454	33.1038	6.83806	#VALUE!	0.0437908	1.39893	0.895981	0.258447	#VALUE!	1.70946	2.69171	0.274956	3.91108	0.0996385	5.2385	4.15103	-	0.946002	7.07145	-	1.07921	1	14.8112	1.63791
95% confidence interval lower lim											98.1447	0.417698	0.136872	-0.0071761	0.0114562	0.0953595	0.227526	#VALUE!	0.0170476	0.01	0.00562749	0.01	#VALUE!	0.208965	0.227309	99.8938	18.2342	5.01186	10	0.0150861	0.594948	0.408514	0.11965	0.387963	0.635569	1.03739	0.122397	2.69128	0.0570457	2.33539	3.05329	#DIV/0!	0.712933	3.2078	#DIV/0!	0.625622	1	4.14333	0.541313
95% confidence interval upper lim											98.9167	0.748969	0.217795	0.0538428	0.019313	0.160641	0.459141	#VALUE!	0.0322858	0.01	0.0710392	0.01	#VALUE!	0.340369	0.360264	100.357	30.4324	7.56147	10	0.0321866	1.06505	0.684819	0.215017	0.754894	1.25776	2.09594	0.210937	3.96206	0.0922876	4.27794	4.54671	#DIV/0!	1.02973	6.4322	#DIV/0!	0.999712	1	10.07	0.965354
95% CI											0.386002	0.165636	0.0404615	0.0305094	0.00392837	0.0326405	0.115808	#VALUE!	0.00761911	0	0.0327058	0	#VALUE!	0.0657019	0.0664775	0.231396	6.0991	1.27481	0	0.00855025	0.235052	0.138152	0.0476837	0.183466	0.311097	0.529275	0.0442699	0.635391	0.017621	0.971275	0.746713	#VALUE!	0.1584	1.6122	#VALUE!	0.187045	0	2.96333	0.212021
99% CI lower lim											98.0226	0.365303	0.124073	-0.016827	0.0102136	0.0850344	0.190892	#VALUE!	0.0146374	0.01	-0.00471824	0.01	#VALUE!	0.188182	0.20628	99.8206	16.3049	4.60861	10	0.0123814	0.520595	0.364813	0.104566	0.329928	0.537161	0.869968	0.108393	2.49028	0.0514717	2.02815	2.81708	#DIV/0!	0.662827	2.69782	#DIV/0!	0.566454	1	3.20595	0.474245
99% CI upper lim											99.0388	0.801364	0.230594	0.0634937	0.0205556	0.170966	0.495774	#VALUE!	0.0346959	0.01	0.0813849	0.01	#VALUE!	0.361152	0.381293	100.43	32.3617	7.96473	10	0.0348913	1.13941	0.72852	0.230101	0.81293	1.35617	2.26337	0.22494	4.16305	0.0978616	4.58518	4.78292	#DIV/0!	1.07984	6.94218	#DIV/0!	1.05888	1	11.0074	1.03242
99% CI											0.508104	0.21803	0.0532605	0.0401604	0.00517101	0.0429656	0.152441	#VALUE!	0.0100292	0	0.0430516	0	#VALUE!	0.0864851	0.0875062	0.304593	8.02841	1.67806	0	0.0112549	0.309405	0.181853	0.0627674	0.241501	0.409506	0.696699	0.0582737	0.836382	0.023195	1.27851	0.982919	#VALUE!	0.208506	2.12218	#VALUE!	0.246212	0	3.90071	0.279089
Reference Materials BVC
STD Expected											61.13	13.95	7.47	6	2.88	4.11	1.29	0.5	0.69	0.13	0.32						486													68.5		470			27			317.1
STD SO-19											60.19	14.04	7.57	5.95	2.95	4.07	1.31	0.506	0.71	0.13	0.32			1.9			466													80		476			26			316
STD SO-19											60.36	14.05	7.43	5.95	2.95	4.06	1.31	0.501	0.71	0.13	0.31			1.9			461													74		466			26			317
STD SO-19											60.23	14.07	7.57	5.94	2.93	4.04	1.3	0.507	0.71	0.13	0.32			1.9			472													71		467			26			314
STD SO-19											60.18	14.13	7.54	5.94	2.94	4.05	1.31	0.511	0.7	0.13	0.33			1.9			473													74		476			27			315
Accuracy (Absolute difference; wt% ox or ppm)											0.89	0.1225	0.0575	0.055	0.0625	0.055	0.0175	0.00625	0.0175	0	0						18													6.25		1.25			0.75			1.6
Accuracy (% relative to cert.)											0.0145591	0.00878136	0.00769746	0.00916667	0.0217014	0.013382	0.0135659	0.0125	0.0253623	0	0						0.037037													0.0912409		0.00265957			0.0277778			0.00504573
RSD											0.00137559	0.00286454	0.00883702	0.000971153	0.00325379	0.00318371	0.00382409	0.00812442	0.00706714	0	0.0255155						0.0119607													0.0505006		0.0116711			0.0190476			0.0040919
Duplicates BVC
KSL 15-2 REP											98.53	0.39	0.1	b.d.	0.01	0.1	0.19	b.d.	0.02	b.d.	0.01			0.5			11													b.d.		b.d			b.d.			6
Blank 1											0.03	b.d.	b.d.	b.d.	b.d.	b.d.	b.d.	b.d.	b.d.	b.d.	b.d.			b.d.			b.d.													b.d.		b.d.			b.d.			b.d.
Blank 2											0.02	b.d.	b.d.	b.d.	b.d.	b.d.	b.d.	b.d.	b.d.	b.d.	b.d.			b.d.			b.d.													b.d.		b.d.			b.d.			b.d.
Reference Materials STA
GSP2-granodiorite certified																											1340	410										180		27	200	17				27		240
GSP2 (Raczek et al, 2000)																											1340	445			5.74	2.26	2.27		12.2		1	186	0.223		207		50.7	242		26.2		238
GSP2 17.08																											1257	392.1										166.9		27.7	183.4	21.2				23.8		230.9
GSP2 19.08 TE																											1370	453.6										180.7		26.3	185.7	13.8				22.1		233.1
Accuracy (Absolute difference; ppm)																											26.5	12.85										6.2		0	15.45	0.5				4.05		8
Accuracy (% relative to cert.)																											0.0197761	0.0313415										0.0344444		0	0.07725	0.0294118				0.15		0.0333333
RSD																											0.0608322	0.102843										0.0561454		0.0366648	0.00881249	0.299005				0.0523783		0.00670532
Duplicates ALS
KS19-3-5-DUP											98.5	0.61	0.16	0.01	0.03	0.15	0.33	b.d.	0.04	b.d.	b.d.	b.d.	b.d.				29.4	4.6	10	0.02	0.52	0.38	0.1	0.6	0.48	2.5	0.11	3.3	0.06	3.2	2.8	0.77	4.6	0.6		1	4.1	0.4	0.08
KS19-3-10-DUP											>100	0.2	0.11	b.d.	0.01	0.07	0.06	b.d.	0.02	b.d.	0.01	b.d.	b.d.
KS19-8-3d-DUP											96.2	1.9	0.59	0.02	0.02	1.12	0.37	b.d.	0.24	0.07	b.d.	0.01	0.01	0.31		100.86	73.8	67.8	10	0.14	16.05	13.65	0.62	7	7.66	19.6	3.69	20.8	2.08	239	22.1	5.92	30.5	5.81		13	17.6	14.9	1.89
KS19-6-QT 1.1-DUP																								0.21
KS19-10-QT 2.1-DUP											98.8	0.37	0.09	b.d.	0.01	0.07	0.24	b.d.	0.02	b.d.	b.d.	b.d.	b.d.				16.5	4.2	b.d.	b.d.	0.89	0.59	0.23	0.2	1.19	1	0.18	3.7	0.07	1.9	3.3	0.82	3.2	0.94		1	4.6	0.6	0.15
KS19-10-QT 3.3-DUP											99.4	0.27	0.06	b.d.	0.01	0.16	0.01	b.d.	0.03	b.d.	b.d.	b.d.	b.d.				14.1	14.6	b.d.	0.03	1.54	0.84	0.51	0.4	2.42	0.9	0.25	8.9	0.09	2.4	13.4	2.79	0.6	2.92		1	6.6	0.6	0.26
KS19-14-QT 1.1-DUP																								0.12
KS19-15-QT 2.1-DUP											98.2	1.07	0.14	0.01	0.01	0.07	0.87	b.d.	0.03	b.d.	b.d.	b.d.	b.d.
KSL-T3-4a-DUP																											66.8	48.1	<10	0.12	2.03	1.32	0.39	5.2	2.58	4.4	0.4	18.9	0.2	11.7	17.2	4.29	49.8	3.34		1	38.1	0.8	0.35
KS19-8-3A-DUP																											727	107.5	<10	0.64	8	4.24	1.07	25.4	8.42	7.9	1.39	42.5	0.46	19.4	59.4	13.95	167.5	11		3	291	1.9	1.16
Reference Materials ALS (in order of analysis)
OREAS 102a											65.3	12.3	8.01	1.95	2.22	0.16	4.32	0.005	0.29	0.06	0.14	<0.01	0.04			94.8
SY-4											49.2	20.7	6.22	7.92	0.52	7.16	1.66	0.002	0.28	0.11	0.12	0.13	0.04			98.62
LR-LOI2																								13.3
LR-LOI1																								7.89
AMIS0304											12.2	1.55	21.4	28.6	2.86	0.11	0.25	0.013	1.83	0.46	18.15	0.39	0.29			95.84
OREAS 102a											65.1	12.3	8.05	1.96	2.27	0.15	4.29	0.004	0.28	0.06	0.14	b.d.	0.04				368	557	40	2.94	17	10.95	3.72	22.2	19.2	10.1	3.31	307	1.53	33.7	182.5	53.6	271	25		8	38.7	2.4	2.76
REE-1											66.8	6.79	5.93	3.23	1.49	1.94	3.77	0.039	0.65	0.21	0.06	b.d.	0.01			90.92
LR-LOI3																								19
SY-4																											351	122	10	1.53	19.5	15.25	2.03	36.5	14.3	11.6	4.21	55.9	2.01	12.7	59.8	14.9	53.4	13.6		9	1220	0.7	2.62
LR-LOI1																								7.73
LR-LOI4																								22.4
AMIS0304											12	1.51	21.3	28.7	2.88	0.11	0.26	0.013	1.76	0.45	18.25	0.39	0.29				2770	8440	100	0.38	133.5	33.9	148.5	54.1	337	27.5	16.55	3460	1.93	>2500	4320	>1000	11.3	596		25	3540	11.4	31.6
REE-1											66.8	6.8	5.9	3.23	1.5	1.95	3.81	0.039	0.65	0.21	0.05	0.02	0.01				103.5	4060	290	1.03	865	717	24.6	67.8	430	483	199.5	1630	88.5	>2500	1520	437	1030	403		536	123	222	103
LR-LOI3																								18.9
SY-4																											366	117.5	10	1.43	20	15	1.91	37.3	14.65	12.2	4.2	55.3	2.04	12.6	62.8	14.35	59.3	13.45		9	1300	0.7	2.54
REE-1																											106.5	4260	300	1.01	877	724	23.1	65.1	440	478	196	1800	88.2	>2500	1470	407	1095	383		537	106.5	216	101
SY4 Expected											49.9	20.7	6.21	8.05	0.54	7.1	1.66	0.001	0.29	0.11	0.13	0.14	0.04				340	122	10	1.5	18.2	14.2	2	36.9	14	11.1	4.3	58	2.1	13	57	15	55	12.7		8	1190	0.9	2.6
AVG SY-4		No	Yes								49.2	20.7	6.22	7.92	0.52	7.16	1.66	0.002	0.28	0.11	0.12	0.13	0.04			98.62	358.5	119.75	10	1.48	19.75	15.125	1.97	36.9	14.475	11.9	4.205	55.6	2.025	12.65	61.3	14.625	56.35	13.525		9	1260	0.7	2.58
SD SY-4		No	Yes																								10.6066	3.18198	0	0.0707107	0.353553	0.176777	0.0848528	0.565685	0.247487	0.424264	0.00707107	0.424264	0.0212132	0.0707107	2.12132	0.388909	4.17193	0.106066		0	56.5685	0	0.0565685
2-sigma SY-4		No	Yes																								21.2132	6.36396	0	0.141421	0.707107	0.353553	0.169706	1.13137	0.494975	0.848528	0.0141421	0.848528	0.0424264	0.141421	4.24264	0.777817	8.34386	0.212132		0	113.137	0	0.113137
Accuracy (Absolute difference; ppm)											0.7	0	0.01	0.13	0.02	0.06	0	0.001	0.01	0	0.01	0.01	0			98.62	18.5	2.25	0	0.02	1.55	0.925	0.03	0	0.475	0.8	0.095	2.4	0.075	0.35	4.3	0.375	1.35	0.825		1	70	0.2	0.02
Accuracy (% relative to cert.)											0.0140281	0	0.00161031	0.0161491	0.037037	0.0084507	0	1	0.0344828	0	0.0769231	0.0714286	0			#DIV/0!	0.0544118	0.0184426	0	0.0133333	0.0851648	0.0651408	0.015	0	0.0339286	0.0720721	0.022093	0.0413793	0.0357143	0.0269231	0.0754386	0.025	0.0245455	0.0649606		0.125	0.0588235	0.222222	0.00769231
RSD																										0	0.0295861	0.0265719	0	0.0477775	0.0179014	0.0116877	0.0430725	0.0153302	0.0170976	0.0356524	0.00168159	0.00763065	0.0104757	0.00558978	0.0346056	0.026592	0.074036	0.00784222		0	0.0448957	0	0.0219258
OREAS 102a Expected											65.8	12.4	8.16	1.98	2.25	0.18	4.38	0.004	0.29	0.07	0.14		0.04
AVG OREAS 102		Yes	No								65.2	12.3	8.03	1.955	2.245	0.155	4.305	0.0045	0.285	0.06	0.14	#DIV/0!	0.04			94.8	368	557	40	2.94	17	10.95	3.72	22.2	19.2	10.1	3.31	307	1.53	33.7	182.5	53.6	271	25		8	38.7	2.4	2.76
SD OREAS 102a		Yes	No								0.141421	0	0.0282843	0.00707107	0.0353553	0.00707107	0.0212132	0.000707107	0.00707107	0	0	#DIV/0!	0
2-sigma OREAS 102a		Yes	No								0.282843	0	0.0565685	0.0141421	0.0707107	0.0141421	0.0424264	0.00141421	0.0141421	0	0	#DIV/0!	0
Accuracy (Absolute difference; ppm)											0.6	0.1	0.13	0.025	0.005	0.025	0.075	0.0005	0.005	0.01	0	#DIV/0!	0
Accuracy (% relative to cert.)											0.00911854	0.00806452	0.0159314	0.0126263	0.00222222	0.138889	0.0171233	0.125	0.0172414	0.142857	0	#DIV/0!	0
RSD											0.00216904	0	0.00352233	0.00361691	0.0157485	0.0456198	0.00492757	0.157135	0.0248108	0	0	#DIV/0!	0
REE1 Expected											67.1	6.78	5.95	3.22	1.48	1.95	3.72	0.04	0.64	0.2	0.06	0	0.01
AVG REE1		Yes	No								66.8	6.795	5.915	3.23	1.495	1.945	3.79	0.039	0.65	0.21	0.055	0.02	0.01			90.92	105	4160	295	1.02	871	720.5	23.85	66.45	435	480.5	197.75	1715	88.35	#DIV/0!	1495	422	1062.5	393		536.5	114.75	219	102
SD REE1		Yes	No								0	0.00707107	0.0212132	0	0.00707107	0.00707107	0.0282843	0	0	0	0.00707107	#DIV/0!	0				2.12132	141.421	7.07107	0.0141421	8.48528	4.94975	1.06066	1.90919	7.07107	3.53553	2.47487	120.208	0.212132	#DIV/0!	35.3553	21.2132	45.9619	14.1421		0.707107	11.6673	4.24264	1.41421
2-sigma REE1		Yes	No								0	0.0141421	0.0424264	0	0.0141421	0.0141421	0.0565685	0	0	0	0.0141421	#DIV/0!	0				4.24264	282.843	14.1421	0.0282843	16.9706	9.89949	2.12132	3.81838	14.1421	7.07107	4.94975	240.416	0.424264	#DIV/0!	70.7107	42.4264	91.9239	28.2843		1.41421	23.3345	8.48528	2.82843
Accuracy (Absolute difference; ppm)											0.3	0.015	0.035	0.01	0.015	0.005	0.07	0.001	0.01	0.01	0.005	0.02	0
Accuracy (% relative to cert.)											0.00447094	0.00221239	0.00588235	0.00310559	0.0101351	0.0025641	0.0188172	0.025	0.015625	0.05	0.0833333	#DIV/0!	0
RSD											0	0.00104063	0.00358634	0	0.00472981	0.00363551	0.00746287	0	0	0	0.128565	#DIV/0!	0
AMIS0304 Expected											12.3	1.52	20.9	28.5	2.87	0.09	0.28	0.01	1.8	0.46	18.35	0.4	0.28				2600	8090	90	0.4	132	34	150	53.2	343	28	18	3610	2.05	5190	4010	1030	10.5	604		25	3400	12.4	34.3
AVG AMIS0304		Yes	No								12.1	1.53	21.35	28.65	2.87	0.11	0.255	0.013	1.795	0.455	18.2	0.39	0.29			95.84	2770	8440	100	0.38	133.5	33.9	148.5	54.1	337	27.5	16.55	3460	1.93	#DIV/0!	4320	#DIV/0!	11.3	596		25	3540	11.4	31.6
SD AMIS0304 (ME)		Yes	No								0.141421	0.0282843	0.0707107	0.0707107	0.0141421	0	0.00707107	0	0.0494975	0.00707107	0.0707107	0	0				#DIV/0!	#DIV/0!	#DIV/0!	#DIV/0!	#DIV/0!	#DIV/0!	#DIV/0!	#DIV/0!	#DIV/0!	#DIV/0!	#DIV/0!	#DIV/0!	#DIV/0!	#DIV/0!	#DIV/0!	#DIV/0!	#DIV/0!	#DIV/0!		#DIV/0!	#DIV/0!	#DIV/0!	#DIV/0!
2-sigma AMIS0304 (ME)		Yes	No								0.282843	0.0565685	0.141421	0.141421	0.0282843	0	0.0141421	0	0.0989949	0.0141421	0.141421	0	0				#DIV/0!	#DIV/0!	#DIV/0!	#DIV/0!	#DIV/0!	#DIV/0!	#DIV/0!	#DIV/0!	#DIV/0!	#DIV/0!	#DIV/0!	#DIV/0!	#DIV/0!	#DIV/0!	#DIV/0!	#DIV/0!	#DIV/0!	#DIV/0!		#DIV/0!	#DIV/0!	#DIV/0!	#DIV/0!
Accuracy (Absolute difference; ppm)											0.2	0.01	0.45	0.15	0	0.02	0.025	0.003	0.005	0.005	0.15	0.01	0.01
Accuracy (% relative to cert.)											0.0162602	0.00657895	0.0215311	0.00526316	0	0.222222	0.0892857	0.3	0.00277778	0.0108696	0.00817439	0.025	0.0357143
RSD											0.0116877	0.0184865	0.00331198	0.00246809	0.00492757	0	0.0277297	0	0.0275752	0.0155408	0.0038852	0	0
LOI standards
LO1 Exp																								2.22222e+23
LO2 Exp																								18.75
LO3 Exp																								13.2
LO4 Exp																								22.4
Blanks
Blank 1											0.01	0.01	b.d.	b.d.	b.d.	0.01	b.d.	b.d.	b.d.	b.d.	b.d.	b.d.	b.d.				b.d.	b.d.	b.d.	b.d.	b.d.	b.d.	b.d.	b.d.	b.d.	0.1	0.01	0.1	b.d.	b.d.	b.d.	b.d.	b.d.	b.d.		1	0.1	0.1	0.01
Blank 2											b.d.	b.d.	b.d.	b.d.	0.01	0.01	b.d.	b.d.	b.d.	b.d.	b.d.	b.d.	b.d.				0.6	b.d.	b.d.	b.d.	b.d.	b.d.	0.02	0.1	b.d.	0.1	0.02	0.1	0.01	0.1	b.d.	0.03	0.2	0.03		1	0.2	0.1	0.01
Blank 3											0.01	0.02	0.01	b.d.	0.01	b.d.	b.d.	b.d.	b.d.	b.d.	b.d.	b.d.	b.d.			0.05
Blank 4											0.01	0.01	0.01	b.d.	0.01	0.02	b.d.	b.d.	b.d.	b.d.	b.d.	b.d.	b.d.			0.06
Blank 5																								0
Blank 6																								0
Blank 7																								0
Blank 8											b.d.	0.01	b.d.	b.d.	0.01	b.d.	b.d.	b.d.	b.d.	b.d.	b.d.	b.d.	b.d.				0.5	b.d.	b.d.	0.01	b.d.	b.d.	b.d.	b.d.	b.d.	0.1	0.01	0.1	b.d.	b.d.	0.1	b.d.	b.d.	b.d.		1	0.1	b.d.	0.01
Blank 9											b.d.	b.d.	b.d.	b.d.	b.d.	0.01	b.d.	b.d.	b.d.	b.d.	b.d.	b.d.	b.d.				b.d.	b.d.	b.d.	b.d.	b.d.	0.03	b.d.	b.d.	b.d.	0.1	0.01	0.1	b.d.	0.1	b.d.	b.d.	b.d.	b.d.		1	0.1	b.d.	b.d.
Blank 10											b.d.	0.02	0.02	b.d.	0.01	0.01	b.d.	b.d.	b.d.	b.d.	b.d.	b.d.	b.d.			0.06
Blank 11											b.d.	0.02	0.01	b.d.	0.01	0.02	b.d.	b.d.	b.d.	b.d.	0.01	b.d.	b.d.			0.07
Blank 12																											0.6	0.1	b.d.	0.04	b.d.	b.d.	0.02	b.d.	b.d.	0.1	0.01	0.1	0.02	b.d.	b.d.	b.d.	b.d.	b.d.		1	0.1	0.1	0.01
Blank 13																											0.9	0.1	b.d.	b.d.	b.d.	b.d.	b.d.	b.d.	b.d.	0.1	0.01	0.1	b.d.	b.d.	b.d.	b.d.	b.d.	b.d.		1	0.1	0.1	0.01
[truncated: 21 more columns]

## Sheet: DR2-Estimate Summary
	Volume	Tonnage		ThO2	UO2	Nb2O5	Ta2O5	ZrO2	TiO2		ƩLREO	Pr + Eu + Gd	ƩHREO	TREO	CHFSEO-TiO2	CHSFEO		ƩLREO	Pr+Eu+Gd	ƩHREO	TREO	ƩCHFSEO-TiO2	ƩCHFSEO		Na2O	K2O	BaO	CaO
	km3	Gt		wt%	wt%	wt%	wt%	wt%	wt%		wt%	wt% ox.	wt%	wt%	wt%	wt%		Mt	Mt	Mt	Mt	Mt	Mt		Mt	Mt	Mt	Mt
Illerfissalik
I4 syenite*				0.00250907	0.000419728	0.00817451	na	0.0435213	0.757778		0.0422835	na	na	0.0423	0.096908	0.854686
Ellipsoid 1	219.593	570.943																235.522	na	na	235.522	592.345	4918.82		40302.2	16341.7	484.425	26409.3
Ellipsoid 2	267.982	1141.89																482.829	na	na	482.829	1184.69	9837.65		80604.4	32683.3	968.851	52818.6
Cylinder	164.695	428.207																181.061	na	na	181.061	444.259	3689.12		30226.7	12256.2	363.319	19807
Average	217.424	713.679																299.804	na	na	299.804	740.431	6148.53		50377.8	20427.1	605.532	33011.6
I4 Fenite (400 m)				0.000488159	0.000170889	0.00543794	0.000187862	0.0152573	0.0942857		0.0204815	0.0019884	0.00383528	0.0263052	0.0418358	0.136122
Ellipsoid 1	45.4966	144.8																29.6573	2.87921	5.60386	38.1404	64.3794	200.905		925.687	2718.11	43.8332	635.052
Ellipsoid 2	59.8062	205.395																42.0681	4.08408	7.94894	54.1011	91.3205	284.979		1313.06	3855.56	62.1763	900.805
Cylinder	34.1225	108.6																22.243	2.15941	4.2029	28.6053	48.2846	150.679		694.265	2038.58	32.8749	476.289
Eriksfjord Protolith (comparative volume, 400 m)				0.00017243	2.88138e-05	0.000473019	9.19895e-05	0.00869915	0.0246667		0.00166398	0.00023046	0.000911874	0.00280631	0.0110374	0.0357041
Ellipsoid 1	45.4966	144.8																2.40944	0.333707	1.33318	4.07633	16.9187	52.6361		185.344	497.147	3.93396	86.8801
Ellipsoid 2	59.8062	205.395																3.41773	0.473355	1.89109	5.78218	23.9988	74.663		262.906	705.191	5.58022	123.237
Cylinder	34.1225	108.6																1.80708	0.25028	0.999888	3.05725	12.6891	39.4771		139.008	372.861	2.95047	65.1601
Average	46.4751	152.932																2.54475	0.352448	1.40805	4.30525	17.8689	55.5921		195.753	525.066	4.15488	91.7592
Mean Fenite (global average of all geometries in DR 2.1-2.2)	55.7418	177.952																36.4473	3.5384	6.88686	46.8725	79.119	246.902		1137.62	3340.41	53.8688	780.447
MIN Fenite																		12.3628	1.20021	2.336	15.899	26.8369	83.7483		385.877	1133.06	18.2721	5.93378
MAX Fenite																		79.1261	7.68177	14.9512	101.759	171.765	536.019		2469.75	7251.95	116.948	37.9783
Δ																		33.9025	3.18595	5.47881	42.5673	61.2501	191.31		941.869	2815.35	49.7139	688.688
XTotal = [I4 + (fenite-protolith)]
Ellipsoid 1																		262.77			269.586	639.806	5067.09		41042.6	18562.6	524.325	26957.5
Ellipsoid 2																		521.479			531.148	1252.01	10048		81654.6	35833.7	1025.45	53596.1
Cylinder																		201.497			206.609	479.854	3800.32		30781.9	13922	393.243	20218.1
Average																		333.706			342.371	801.681	6339.84		51319.6	23242.4	655.246	33700.3
% of the budget																		0.101594			0.124331	0.0764021	0.0301759		0.018353	0.12113	0.0758706	0.0204357
Ilimaussaq
Black Madonna (BM)	5.01237	13.0322		0.00716877	0.00328976	0.124024		0.571523	0.55		0.194937	0.00455055	0.0466804	0.246168	0.900943	1.45094		42.1188	0.350774	13.2281	55.6977	280.899	315.33
Wt KKT	19.0263	36.4361		0.00125829	0.00229081	0.131197		1.5933	0.2642		0.323191	0.0026916	0.100783	0.427386	2.05123	2.31543		117.758	0.980715	36.9839	155.723	785.355	881.619
Trn KKT-LJV	5.58927	14.5321		0.000629145	0.00247265	0.0655984		0.796648	0.2571		0.161596	0.0013458	0.111601	0.274902	1.02694	1.28404		46.9664	0.391146	14.7506	62.1081	313.229	351.623
Wt Lujavrite	121.768	170.516		0.0254309	0.0160421	0.0616188		0.250492	0.235		0.683815	0.00631486	0.0926846	0.783535	1.0374	1.2724		1166.01	10.7678	159.27	1336.05	1938.97	2339.68
Naujaite	31.5695	82.0807		0.000466539	0.000221208	0.0106143		0.0588949	0.32		0.0282007	0.000111506	0.00653526	0.0348475	0.0983976	0.418398		23.1473	0.0915248	5.36419	28.6031	86.2212	348.88
Total	182.966	316.597																1396.01	12.582	229.596	1638.18	3404.67	4237.13
Mass% of Total Mass																		0.440941	0.00397414	0.0725201	0.517435	1.0754	1.33834
* - assuming TREO = LREO; agpaitic phonolite dyke assumed as the BM composition; na - not analysed
ƩCHFSEO, chosen HFSE oxides = (Zr, Nb, Ti, Y, U, Th, LREE); Ta and Hf omitted for comparative purposes due to lack of data for I4 syenite
ƩLREO = (La, Ce, Nd, Sm)
ƩHREO = (Tb-Lu+Y)

## Sheet: DR2.1 Rock volumes
	Type + geometry	2a (diameter, long; km)	2b (diameter, short; km)	2c (floor-roof height; km)	a (km)	b (km)	c (km)	h (height of cap; km)	x (c-h)	Density (g/cm3)	Density (t/km3)	Total Rock Volume (km3)	Tonnage (t)	Tonnage (Mt)	Total Cap Volume (km3)	Ratio fenite to intr
Illerfissalik	I4 intrusion ellipsoid	14.05	9.95	3	7.025	4.975	1.5			2.6	2600000000	219.593	5.70943e+11	570943		0.207186
	I4 intrusion ellipsoid 2 (longer x)	17.146	9.95	3	8.573	4.975	1.5			2.6	2600000000	267.982	6.96753e+11	696753		0.201152
	I4 ellipsoid (long z axis)	14.05	9.95	6	7.025	4.975	3			2.6	2600000000	439.187	1.14189e+12	1.14189e+06		0.136175
	I4 cylinder	14.05	9.95	3	7.025	4.975	1.5			2.6	2600000000	164.695	4.28207e+11	428207		0.207186
	I4 cylinder 2 (longer x)	17.146	9.95	3	8.573	4.975	1.5			2.6	2600000000	200.987	5.22565e+11	522565		0.201152
											0
	I4 intrusion + fenite (200m)	14.25	10.105	3.2	7.125	5.0525	1.6			2.7	2700000000	241.268	6.51424e+11	651424
	I4 intrusion + fenite (add 400m)	14.45	10.305	3.4	7.225	5.1525	1.7			2.7	2700000000	265.09	7.15743e+11	715743
	I4 intrusion + fenite (add 800 m)	14.85	10.705	3.8	7.425	5.3525	1.9			2.7	2700000000	316.297	8.54002e+11	854002
	I4 intrusion 2 (longer x) + fenite	17.546	10.305	3.4	8.773	5.1525	1.7			2.7	2700000000	321.887	8.69095e+11	869095
	I4 elllipsoid (long z axis + 200m fenite)	14.25	10.105	6.2	7.125	5.0525	3.1			2.7	2700000000	467.457	1.26213e+12	1.26213e+06
	I4 ellipsoid (long z axis + 400m fenite)	14.45	10.305	6.4	7.225	5.1525	3.2			2.7	2700000000	498.993	1.34728e+12	1.34728e+06
	I4 ellipsoid (long z axis + 800m fenite)	14.85	10.705	6.8	7.425	5.3525	3.4			2.7	2700000000	566.006	1.52821e+12	1.52821e+06
	I4 cyllinder + fenite (200m)	14.25	10.105	3.2	7.125	5.0525	1.6			2.7	2700000000	180.951	4.88568e+11	488568
	I4 cylinder + fenite (400m)	14.45	10.305	3.4	7.225	5.1525	1.7			2.7	2700000000	198.818	5.36807e+11	536807
	I4 cylinder 2 (longer x) + fenite	17.546	10.305	3.4	8.773	5.1525	1.7			2.7	2700000000	241.415	6.51822e+11	651822
	I4 cylinder + fenite (800 m)	14.85	10.705	3.8	7.425	5.3525	1.9			2.7	2700000000	237.223	6.40502e+11	640502
	Fenite carapace (200 m), ellipsoid 1									2.6	2600000000	21.6746	8.04808e+10	80480.8
	Fenite carapace (400 m), ellipsoid 1									2.6	2600000000	45.4966	1.448e+11	144800
	Fenite carapace (800 m), ellipsoid 1									2.6	2600000000	96.7038	2.8306e+11	283060
	Fenite carapace, ellipsoid 3(longer x)									2.6	2600000000	53.9051	1.72342e+11	172342
	Fenite carapace, ellipsoid 2 long z axis (200m)									2.6	2600000000	28.27	1.20248e+11	120248
	Fenite carapace, ellipsoid 2 long z axis (400m)									2.6	2600000000	59.8062	2.05395e+11	205395
	Fenite carapace, ellipsoid 2 long z axis (800m)									2.6	2600000000	126.819	3.86329e+11	386329
	Fenite carapace cyllinder (200m)									2.6	2600000000	16.256	6.03606e+10	60360.6
	Fenite carapace cylinder (400m)									2.6	2600000000	34.1225	1.086e+11	108600
	Fenite carapace cylinder 2 (longer x)									2.6	2600000000	40.4288	1.29256e+11	129256
	Fenite carapace cylinder (800 m)									2.6	2600000000	72.5278	2.12295e+11	212295
											0
Ilimaussaq	Black Madonna	17	7.6	1.8	8.5	3.8	0.9	0.22	0.68	2.6	2600000000	5.01237	1.30322e+10	13032.2	5.01237		13032.2
	Kakortokite series (KK cap - BM cap)	17	7.6	1.8	8.5	3.8	0.9	0.45	0.45	2.6	2600000000	19.0263	4.94683e+10	49468.3		14.0139	36436.1
	Transitional kakortokite (Total cap - KK+BM cap)	17	7.6	1.8	8.5	3.8	0.9			2.6	2600000000	0	1.45321e+10	14532.1	5.58927		14532.1
	Total floor series (KK+BM+transitional)	17	7.6	1.8	8.5	3.8	0.9	0.52	0.38	2.6	2600000000	24.6155	6.40004e+10	64000.4	24.6155		64000.4
	Lujavrite series	17	7.6	1.8	8.5	3.8	0.9			2.6	2600000000	121.768	3.16597e+11	316597		65.5831	170516
	Naujaite series (calc. as cap - roof)	17	7.6	1.8	8.5	3.8	0.9	0.6	0.3	2.6	2600000000	31.5695	2.36034e+07	82080.7	31.5695		82080.7
	Intrusion + fenite (for I4 comparison, 400 m)	17.4	8	2.2	8.7	4	1.1			2.7	2700000000	160.347	4.32937e+11	432937
	Intrusion + fenite (200 m as per Ferguson 1964)	17.2	7.8	2	8.6	3.9	1			2.7	2700000000	140.492	3.79328e+11	379328
	Fenite Carapace (for I4 comparison, 400m)									2.8	2800000000	38.5788	1.08021e+11	108021
	Fenite Carapace (200 m as per Ferguson 1964)									2.8	2800000000	18.7239	5.24269e+10	52426.9

## Sheet: DR2.2 Illerfissalik
400 m wide aureole ellipsoid summary	Unit (component wt% or ppm)			SiO2	Al2O3	Fe2O3	CaO	MgO	Na2O	K2O	Cr2O3	TiO2	MnO	P2O5	LOI	H2O+ (calc)		Ba	Ce	Cr	Cs	Dy	Er	Eu	Ga	Gd	Hf	Ho	La	Lu	Nb	Nd	Ni	Pr	Rb	Sc	Sm	Sn	Sr	Ta	Tb	Th	Tm	U	V	Y	Yb	Zr
	Average I4			58.5389	16.1211	7.16333	4.62556	1.38	7.05889	2.86222	#DIV/0!	0.757778	0.257778	0.352222	0.496667	1.27249		759.933	186.225	#DIV/0!	#DIV/0!	#DIV/0!	#DIV/0!	#DIV/0!	#DIV/0!	#DIV/0!	#DIV/0!	#DIV/0!	78.75	#DIV/0!	57.1444	87.475	6.86667	#DIV/0!	#DIV/0!	12.75	8.9	#DIV/0!	714.667	#DIV/0!	#DIV/0!	22.05	#DIV/0!	3.7	#DIV/0!	53.8667	#DIV/0!	322.189
	Average Fenite			92.64	2.645	0.921429	0.438571	0.307692	0.639286	1.87714	#DIV/0!	0.0942857	0.0938462	0.0357143	0.312857	0.424908		271.129	83.9286	10	0.124167	4.38692	2.31	1.13692	3.41538	5.52692	2.92308	0.766154	45.0429	0.273077	38.0143	39.1643	3.6	10.4223	29.7	#DIV/0!	6.90077	1.30769	103.593	1.53846	0.728462	4.29	0.304615	1.50643	8.625	20.6714	2.10692	112.95
	Average Protolith			98.5307	0.583333	0.177333	0.02	0.0153846	0.128	0.343333	#DIV/0!	0.0246667	0.01	0.0383333	0.274667	0.293787		24.3333	6.28667	10	0.0236364	0.83	0.546667	0.167333	0.571429	0.946667	1.56667	0.166667	3.32667	0.0746667	3.30667	3.8	#DIV/0!	0.871333	4.82	#DIV/0!	0.812667	1	7.10667	0.753333	0.131333	1.51533	0.0773333	0.254	5.5	5.09333	0.567333	64.4
	Difference			-5.89067	2.06167	0.744095	0.418571	0.292308	0.511286	1.53381	#DIV/0!	0.069619	0.0838462	-0.00261905	0.0381905	0.131122		246.795	77.6419	0	0.10053	3.55692	1.76333	0.96959	2.84396	4.58026	1.35641	0.599487	41.7162	0.19841	34.7076	35.3643	#DIV/0!	9.55097	24.88	#DIV/0!	6.0881	0.307692	96.4862	0.785128	0.597128	2.77467	0.227282	1.25243	3.125	15.5781	1.53959	48.55
	elements added
	removed from prot.
	Fen components added + I4			64.4296	18.1828	7.90743	5.04413	1.67231	7.57017	4.39603	#DIV/0!	0.827397	0.341624	0.354841	0.534857	1.40361		1006.73	263.867	#DIV/0!	#DIV/0!	#DIV/0!	#DIV/0!	#DIV/0!	#DIV/0!	#DIV/0!	#DIV/0!	#DIV/0!	120.466	#DIV/0!	91.8521	122.839	#DIV/0!	#DIV/0!	#DIV/0!	#DIV/0!	14.9881	#DIV/0!	811.153	#DIV/0!	#DIV/0!	24.8247	#DIV/0!	4.95243	#DIV/0!	69.4448	#DIV/0!	370.739
	Ratio			0.091428	0.113386	0.0941008	0.0829819	0.174793	0.0675395	0.348908	#DIV/0!	0.0841423	0.245434	0.0073809	0.0714031	0.0934175	#DIV/0!	0.245146	0.294246	#DIV/0!	#DIV/0!	#DIV/0!	#DIV/0!	#DIV/0!	#DIV/0!	#DIV/0!	#DIV/0!	#DIV/0!	0.34629	#DIV/0!	0.377864	0.287891	#DIV/0!	#DIV/0!	#DIV/0!	#DIV/0!	0.406196	#DIV/0!	0.118949	#DIV/0!	#DIV/0!	0.111771	#DIV/0!	0.252892	#DIV/0!	0.224324	#DIV/0!	0.130955
	Component conversion to wt% oxide																	1.1165	1.1713	1.4615	1.0602	1.1477	1.1435	1.1579	1.3442	1.1526	1.1793	1.1455	1.1728	1.1371	1.4305	1.1664	1.2725	1.1703	1.0936	1.5338	1.1596	1.2696	1.1826	1.2211	1.151	1.1379	1.1421	1.1344	1.7852	1.2699	1.1387	1.3508
				SiO2	Al2O3	Fe2O3	CaO	MgO	Na2O	K2O	Cr2O3	TiO2	MnO	P2O5	LOI	H2O+ (calc)		BaO	Ce2O3	Cr2O3	Cs2O3	Dy2O3	Er2O3	Eu2O3	Ga2O3	Gd2O3	HfO2	Ho2O3	La2O3	Lu2O3	Nb2O5	Nd2O3	NiO2	Pr2O3	Rb2O	Sc2O3	Sm2O3	SnO2	SrO	Ta2O5	Tb2O3	ThO2	Tm2O3	UO2	V2O5	Y2O3	Yb2O3	ZrO2
	Average I4			58.5389	16.1211	7.16333	4.62556	1.38	7.05889	2.86222	#DIV/0!	0.757778	0.257778	0.352222	0.496667	1.27249		0.0848466	0.0218125	#DIV/0!	#DIV/0!	#DIV/0!	#DIV/0!	#DIV/0!	#DIV/0!	#DIV/0!	#DIV/0!	#DIV/0!	0.0092358	#DIV/0!	0.00817451	0.0102031	0.000873783	#DIV/0!	#DIV/0!	0.0019556	0.00103204	#DIV/0!	0.0845165	#DIV/0!	#DIV/0!	0.00250907	#DIV/0!	0.000419728	#DIV/0!	0.00684053	#DIV/0!	0.0435213
	Average Fenite			92.64	2.645	0.921429	0.438571	0.307692	0.639286	1.87714	#DIV/0!	0.0942857	0.0938462	0.0357143	0.312857	0.424908		0.0302715	0.00983055	0.0014615	1.31641e-05	0.000503487	0.000264148	0.000131644	0.000459096	0.000637033	0.000344718	8.77629e-05	0.00528263	3.10516e-05	0.00543794	0.00456812	0.0004581	0.00121972	0.00324799	#DIV/0!	0.000800213	0.000166025	0.0122509	0.000187862	8.38459e-05	0.000488159	3.47901e-05	0.000170889	0.00153973	0.00262506	0.000239915	0.0152573
	Average Protolith			98.5307	0.583333	0.177333	0.06	0.0153846	0.128	0.343333	#DIV/0!	0.0246667	0.01	0.0383333	0.274667	0.293787		0.00271682	0.000736357	0.0014615	2.50593e-06	9.52591e-05	6.25113e-05	1.93755e-05	7.68114e-05	0.000109113	0.000184757	1.90917e-05	0.000390151	8.49035e-06	0.000473019	0.000443232	#DIV/0!	0.000101972	0.000527115	#DIV/0!	9.42368e-05	0.00012696	0.000840434	9.19895e-05	1.51165e-05	0.00017243	8.83224e-06	2.88138e-05	0.00098186	0.000646802	6.46022e-05	0.00869915
	Difference			-5.89067	2.06167	0.744095	0.378571	0.292308	0.511286	1.53381	#DIV/0!	0.069619	0.0838462	-0.00261905	0.0381905	0.131122		0.0275547	0.0090942	0	1.06582e-05	0.000408228	0.000201637	0.000112269	0.000382285	0.00052792	0.000159961	6.86713e-05	0.00489247	2.25612e-05	0.00496492	0.00412489	#DIV/0!	0.00111775	0.00272088	#DIV/0!	0.000705976	3.90646e-05	0.0114105	9.5872e-05	6.87295e-05	0.000315729	2.59579e-05	0.000142075	0.000557875	0.00197826	0.000175313	0.00655813
	elements added
	removed from prot.
	Fen components added + I4			64.4296	18.1828	7.90743	5.00413	1.67231	7.57017	4.39603	#DIV/0!	0.827397	0.341624	0.354841	0.534857	1.40361		0.112401	0.0309067	#DIV/0!	#DIV/0!	#DIV/0!	#DIV/0!	#DIV/0!	#DIV/0!	#DIV/0!	#DIV/0!	#DIV/0!	0.0141283	#DIV/0!	0.0131394	0.014328	#DIV/0!	#DIV/0!	#DIV/0!	#DIV/0!	0.00173802	#DIV/0!	0.0959269	#DIV/0!	#DIV/0!	0.0028248	#DIV/0!	0.000561803	#DIV/0!	0.00881879	#DIV/0!	0.0500794
	Ratio			0.091428	0.113386	0.0941008	0.0756518	0.174793	0.0675395	0.348908	#DIV/0!	0.0841423	0.245434	0.0073809	0.0714031	0.0934175	#DIV/0!	0.245146	0.294246	#DIV/0!	#DIV/0!	#DIV/0!	#DIV/0!	#DIV/0!	#DIV/0!	#DIV/0!	#DIV/0!	#DIV/0!	0.34629	#DIV/0!	0.377864	0.287891	#DIV/0!	#DIV/0!	#DIV/0!	#DIV/0!	0.406196	#DIV/0!	0.118949	#DIV/0!	#DIV/0!	0.111771	#DIV/0!	0.252892	#DIV/0!	0.224324	#DIV/0!	0.130955
Different geometries	Fenite (Mt's of oxide)	Total Tonnage (Mt)		SiO2	Al2O3	Fe2O3	CaO	MgO	Na2O	K2O	Cr2O3	TiO2	MnO	P2O5	LOI	H2O+ (calc)		BaO	Ce2O3	Cr2O3	Cs2O3	Dy2O3	Er2O3	Eu2O3	Ga2O3	Gd2O3	HfO2	Ho2O3	La2O3	Lu2O3	Nb2O5	Nd2O3	NiO2	Pr2O3	Rb2O	Sc2O3	Sm2O3	SnO2	SrO	Ta2O5	Tb2O3	ThO2	Tm2O3	UO2	V2O5	Y2O3	Yb2O3	ZrO2	SUM
	Fenite carapace (200 m), ellipsoid 1	80480.8	80.4808	74557.5	2128.72	741.574	352.966	247.633	514.503	1510.74	#DIV/0!	75.8819	75.5282	28.7432	251.79	341.97	0	24.3628	7.91171	1.17623	0.0105946	0.405211	0.212589	0.105948	0.369484	0.51269	0.277432	0.0706323	4.2515	0.0249906	4.3765	3.67646	0.368683	0.981643	2.61401	#DIV/0!	0.644018	0.133618	9.85962	0.151193	0.0674799	0.392875	0.0279994	0.137533	1.23919	2.11267	0.193086	12.2792	80906.5
	Fenite carapace (400 m), ellipsoid 1	144800	144.8	134143	3829.97	1334.23	635.052	445.539	925.687	2718.11	#DIV/0!	136.526	135.889	51.7144	453.018	615.268	0	43.8332	14.2347	2.11626	0.0190617	0.729051	0.382488	0.190621	0.664772	0.922425	0.499153	0.127081	7.64925	0.0449628	7.87415	6.61465	0.66333	1.76616	4.7031	#DIV/0!	1.15871	0.240404	17.7393	0.272024	0.121409	0.706855	0.0503762	0.247448	2.22954	3.8011	0.347398	22.0926	145566
	Fenite carapace (800 m), ellipsoid 1	283060	283.06	262226	7486.93	2608.19	1241.42	870.953	1809.56	5313.43	#DIV/0!	266.885	265.641	101.093	885.572	1202.74	0	85.6864	27.8263	4.13692	0.0372624	1.42517	0.747698	0.372632	1.29952	1.80318	0.975759	0.248421	14.953	0.0878945	15.3926	12.9305	1.2967	3.45254	9.19375	#DIV/0!	2.26508	0.469949	34.6773	0.53176	0.237334	1.38178	0.0984768	0.483718	4.35837	7.4305	0.679103	43.1872	284556
	Fenite carapace cyllinder (200m)	60360.6	60.3606	55918.1	1596.54	556.18	264.725	185.725	385.877	1133.06	#DIV/0!	56.9115	56.6461	21.5574	188.843	256.477	0	18.2721	5.93378	0.882171	0.00794596	0.303908	0.159442	0.0794614	0.277113	0.384517	0.208074	0.0529743	3.18863	0.0187429	3.28238	2.75735	0.276512	0.736232	1.96051	#DIV/0!	0.483014	0.100214	7.39472	0.113394	0.0506099	0.294656	0.0209995	0.10315	0.929394	1.58451	0.144814	9.2094	60679.8
	Fenite carapace cylinder (400m)	108600	108.6	100607	2872.47	1000.67	476.289	334.154	694.265	2038.58	#DIV/0!	102.394	101.917	38.7858	339.763	461.451	0	32.8749	10.676	1.58719	0.0142963	0.546788	0.286866	0.142966	0.498579	0.691819	0.374365	0.0953107	5.73694	0.0337221	5.90562	4.96099	0.497497	1.32462	3.52732	#DIV/0!	0.869033	0.180303	13.3045	0.204018	0.0910568	0.530142	0.0377821	0.185586	1.67215	2.85082	0.260548	16.5694	109174
	Fenite carapace cylinder (800 m)	212295	212.295	196670	5615.19	1956.14	931.064	653.214	1357.17	3985.07	#DIV/0!	200.164	199.23	75.8195	664.179	902.057	0	64.2648	20.8697	3.10269	0.0279468	1.06888	0.560773	0.279474	0.974636	1.35239	0.731819	0.186316	11.2147	0.0659209	11.5445	9.69788	0.972522	2.58941	6.89531	#DIV/0!	1.69881	0.352461	26.008	0.39882	0.178	1.03634	0.0738576	0.362789	3.26878	5.57287	0.509328	32.3904	213417
	Fenite carapace, ellipsoid 2 long z axis (200m)	120248	120.248	111397	3180.55	1108	527.372	369.993	768.726	2257.22	#DIV/0!	113.376	112.848	42.9456	376.204	510.942	0	36.4008	11.821	1.75742	0.0158296	0.605432	0.317633	0.158299	0.552052	0.766018	0.414516	0.105533	6.35224	0.0373388	6.539	5.49306	0.550855	1.46669	3.90564	#DIV/0!	0.962238	0.199641	14.7314	0.225899	0.100823	0.587	0.0418343	0.20549	1.8515	3.15658	0.288493	18.3465	120884
	Fenite carapace, ellipsoid 2 long z axis (400m)	205395	205.395	190278	5432.71	1892.57	900.805	631.986	1313.06	3855.56	#DIV/0!	193.659	192.756	73.3555	642.594	872.742	0	62.1763	20.1915	3.00185	0.0270386	1.03414	0.542549	0.270391	0.942962	1.30844	0.708036	0.180261	10.8503	0.0637785	11.1693	9.38271	0.940916	2.50525	6.67123	#DIV/0!	1.6436	0.341007	25.1628	0.385859	0.172216	1.00266	0.0714573	0.350999	3.16254	5.39176	0.492775	31.3378	206482
	Fenite carapace, ellipsoid 2 long z axis (800m)	386329	386.329	357895	10218.4	3559.75	1694.33	1188.71	2469.75	7251.95	#DIV/0!	364.253	362.555	137.975	1208.66	1641.54	0	116.948	37.9783	5.6462	0.050857	1.94512	1.02048	0.50858	1.77362	2.46105	1.33175	0.339054	20.4083	0.119961	21.0084	17.648	1.76977	4.71214	12.5479	#DIV/0!	3.09146	0.641402	47.3288	0.725764	0.323921	1.8859	0.134404	0.660195	5.94845	10.1414	0.926863	58.9434	388372
	Fenite Carapace (Ilim size, for I4 comparison, 400m)	108021	108.021	100070	2857.14	995.332	473.747	332.371	690.56	2027.7	#DIV/0!	101.848	101.373	38.5788	337.95	458.988	0	32.6994	10.619	1.57872	0.01422	0.543869	0.285335	0.142203	0.495918	0.688127	0.372367	0.094802	5.70632	0.0335421	5.8741	4.93451	0.494842	1.31755	3.5085	#DIV/0!	0.864394	0.179341	13.2335	0.202929	0.0905708	0.527312	0.0375805	0.184595	1.66323	2.83561	0.259158	16.481	108592
	Average		177.952	164855	4706.83	1639.7	780.447	547.545	1137.62	3340.41	#DIV/0!	167.783	167.001	63.5543	556.736	756.133	0	53.8688	17.4937	2.60077	0.0234259	0.895966	0.470058	0.234264	0.816971	1.13361	0.613434	0.156176	9.40054	0.0552569	9.67693	8.12907	0.815198	2.17052	5.77987	#DIV/0!	1.424	0.295444	21.8007	0.334303	0.149206	0.868689	0.0619097	0.304101	2.73999	4.67136	0.426934	27.1507
	Unaltered Reference ellipsoid 1	144800	144.8	142673	844.668	256.779	86.8801	22.277	185.344	497.147	#DIV/0!	35.7174	14.48	55.5068	397.718	425.404	0	3.93396	1.06625	2.11626	0.00362859	0.137935	0.0905166	0.0280558	0.111223	0.157996	0.267529	0.0276448	0.56494	0.012294	0.684932	0.641801	#DIV/0!	0.147656	0.763264	#DIV/0!	0.136455	0.183838	1.21695	0.133201	0.0218887	0.249679	0.0127891	0.0417224	1.42174	0.936571	0.0935442	12.5964	145522
	Unaltered Reference ellipsoid 2	205395	205.395	202377	1198.14	364.234	123.237	31.5993	262.906	705.191	#DIV/0!	50.6642	20.5395	78.7349	564.153	603.424	0	5.58022	1.51244	3.00185	0.00514706	0.195658	0.128395	0.0397964	0.157767	0.224113	0.379482	0.0392134	0.801353	0.0174388	0.971558	0.910378	#DIV/0!	0.209446	1.08267	#DIV/0!	0.193558	0.26077	1.72621	0.188942	0.0310485	0.354163	0.018141	0.0591821	2.0167	1.3285	0.13269	17.8677	206420
	Unaltered Reference cylinder	108600	108.6	107004	633.501	192.584	65.1601	16.7077	139.008	372.861	#DIV/0!	26.788	10.86	41.6301	298.288	319.053	0	2.95047	0.799685	1.58719	0.00272144	0.103452	0.0678874	0.0210419	0.0834173	0.118497	0.200646	0.0207336	0.423705	0.00922053	0.513699	0.481351	#DIV/0!	0.110742	0.572448	#DIV/0!	0.102341	0.137879	0.912713	0.0999008	0.0164165	0.187259	0.00959183	0.0312918	1.0663	0.702428	0.0701581	9.44729	109142
	Unaltered Reference (Ilim size)	108021	108.021	106433	630.12	191.556	64.8123	16.6185	138.266	370.87	#DIV/0!	26.6451	10.8021	41.4079	296.696	317.35	0	2.93472	0.795417	1.57872	0.00270692	0.102899	0.0675251	0.0209295	0.0829721	0.117864	0.199575	0.0206229	0.421444	0.00917132	0.510957	0.478782	#DIV/0!	0.110151	0.569393	#DIV/0!	0.101795	0.137143	0.907842	0.0993676	0.0163289	0.18626	0.00954063	0.0311248	1.06061	0.698679	0.0697837	9.39687	108559
	Δ		25.0201	14169.9	3814.73	1368.5	688.688	524.017	941.869	2815.35
Different geometries	Intrusion (Mt's of oxide)	Total Tonnage (Mt)	Total Rock (Gt)	SiO2	Al2O3	Fe2O3	CaO	MgO	Na2O	K2O	Cr2O3	TiO2	MnO	P2O5	LOI	H2O+ (calc)		BaO	Ce2O3	Cr2O3	Cs2O3	Dy2O3	Er2O3	Eu2O3	Ga2O3	Gd2O3	HfO2	Ho2O3	La2O3	Lu2O3	Nb2O5	Nd2O3	NiO2	Pr2O3	Rb2O	Sc2O3	Sm2O3	SnO2	SrO	Ta2O5	Tb2O3	ThO2	Tm2O3	UO2	V2O5	Y2O3	Yb2O3	ZrO2	SUM
	I4 intrusion ellipsoid 1	570943	570.943	334224	92042.3	40898.5	26409.3	7879.01	40302.2	16341.7	#DIV/0!	4326.48	1471.76	2010.99	2835.68	7265.17	0	484.425	124.537	#DIV/0!	#DIV/0!	#DIV/0!	#DIV/0!	#DIV/0!	#DIV/0!	#DIV/0!	#DIV/0!	#DIV/0!	52.7311	#DIV/0!	46.6718	58.2538	4.9888	#DIV/0!	#DIV/0!	11.1653	5.89238	#DIV/0!	482.541	#DIV/0!	#DIV/0!	14.3254	#DIV/0!	2.39641	#DIV/0!	39.0555	#DIV/0!	248.482	577582
	I4 ellipsoid 2 long z-axis	1.14189e+06	1141.89	668447	184085	81797.1	52818.6	15758	80604.4	32683.3	#DIV/0!	8652.96	2943.53	4021.98	5671.37	14530.3	0	968.851	249.074	#DIV/0!	#DIV/0!	#DIV/0!	#DIV/0!	#DIV/0!	#DIV/0!	#DIV/0!	#DIV/0!	#DIV/0!	105.462	#DIV/0!	93.3436	116.508	9.97761	#DIV/0!	#DIV/0!	22.3307	11.7848	#DIV/0!	965.082	#DIV/0!	#DIV/0!	28.6507	#DIV/0!	4.79281	#DIV/0!	78.111	#DIV/0!	496.963	1.15516e+06
	I4 cylinder	428207	428.207	250668	69031.7	30673.9	19807	5909.26	30226.7	12256.2	#DIV/0!	3244.86	1103.82	1508.24	2126.76	5448.87	0	363.319	93.4028	#DIV/0!	#DIV/0!	#DIV/0!	#DIV/0!	#DIV/0!	#DIV/0!	#DIV/0!	#DIV/0!	#DIV/0!	39.5484	#DIV/0!	35.0038	43.6903	3.7416	#DIV/0!	#DIV/0!	8.374	4.41929	#DIV/0!	361.906	#DIV/0!	#DIV/0!	10.744	#DIV/0!	1.79731	#DIV/0!	29.2916	#DIV/0!	186.361	433187
	I4 cylinder 2 (longer x)	522565	522.565	305904	84243.3	37433.1	24171.5	7211.4	36887.3	14957	#DIV/0!	3959.88	1347.06	1840.59	2595.41	6649.57	0	443.378	113.985	#DIV/0!	#DIV/0!	#DIV/0!	#DIV/0!	#DIV/0!	#DIV/0!	#DIV/0!	#DIV/0!	#DIV/0!	48.2631	#DIV/0!	42.7171	53.3178	4.56609	#DIV/0!	#DIV/0!	10.2193	5.3931	#DIV/0!	441.654	#DIV/0!	#DIV/0!	13.1115	#DIV/0!	2.19335	#DIV/0!	35.7462	#DIV/0!	227.427	528642
	Ilimaussaq scale	316597	316.597	185332	51039	22678.9	14644.4	4369.04	22348.2	9061.71	#DIV/0!	2399.1	816.117	1115.13	1572.43	4028.65	0	268.622	69.0579	#DIV/0!	#DIV/0!	#DIV/0!	#DIV/0!	#DIV/0!	#DIV/0!	#DIV/0!	#DIV/0!	#DIV/0!	29.2403	#DIV/0!	25.8803	32.3027	2.76637	#DIV/0!	#DIV/0!	6.19136	3.26742	#DIV/0!	267.577	#DIV/0!	#DIV/0!	7.94364	#DIV/0!	1.32885	#DIV/0!	21.6569	#DIV/0!	137.787	320279
	Ratio fen-intr (what portion of total component cargo was introduced into fenite)
	Ellipsoid			0.401357	0.0416109	0.0326229	0.0240466	0.0565476	0.0229686	0.16633	#DIV/0!	0.0315559	0.092331	0.0257159	0.159756	0.0846874	#DIV/0!	0.090485	0.114301	#DIV/0!	#DIV/0!	#DIV/0!	#DIV/0!	#DIV/0!	#DIV/0!	#DIV/0!	#DIV/0!	#DIV/0!	0.145061	#DIV/0!	0.168713	0.113549	0.132964	#DIV/0!	#DIV/0!	#DIV/0!	0.196646	#DIV/0!	0.0367623	#DIV/0!	#DIV/0!	0.049343	#DIV/0!	0.103258	#DIV/0!	0.0973256	#DIV/0!	0.0889103
	Ellipsoid 2 (longer a)			#REF!	#REF!	#REF!	#REF!	#REF!	#REF!	#REF!	#REF!	#REF!	#REF!	#REF!	#REF!	#REF!	#REF!	#REF!	#REF!	#REF!	#REF!	#REF!	#REF!	#REF!	#REF!	#REF!	#REF!	#REF!	#REF!	#REF!	#REF!	#REF!	#REF!	#REF!	#REF!	#REF!	#REF!	#REF!	#REF!	#REF!	#REF!	#REF!	#REF!	#REF!	#REF!	#REF!	#REF!	#REF!
	prolate			#REF!	#REF!	#REF!	#REF!	#REF!	#REF!	#REF!	#REF!	#REF!	#REF!	#REF!	#REF!	#REF!	#REF!	#REF!	#REF!	#REF!	#REF!	#REF!	#REF!	#REF!	#REF!	#REF!	#REF!	#REF!	#REF!	#REF!	#REF!	#REF!	#REF!	#REF!	#REF!	#REF!	#REF!	#REF!	#REF!	#REF!	#REF!	#REF!	#REF!	#REF!	#REF!	#REF!	#REF!	#REF!
	Cylinder			0.401357	0.0416109	0.0326229	0.0240466	0.0565476	0.0229686	0.16633	#DIV/0!	0.0315559	0.092331	0.0257159	0.159756	0.0846874	#DIV/0!	0.090485	0.114301	#DIV/0!	#DIV/0!	#DIV/0!	#DIV/0!	#DIV/0!	#DIV/0!	#DIV/0!	#DIV/0!	#DIV/0!	0.145061	#DIV/0!	0.168713	0.113549	0.132964	#DIV/0!	#DIV/0!	#DIV/0!	0.196646	#DIV/0!	0.0367623	#DIV/0!	#DIV/0!	0.049343	#DIV/0!	0.103258	#DIV/0!	0.0973256	#DIV/0!	0.0889103
	Cylinder 2 (longer a)			#REF!	#REF!	#REF!	#REF!	#REF!	#REF!	#REF!	#REF!	#REF!	#REF!	#REF!	#REF!	#REF!	#REF!	#REF!	#REF!	#REF!	#REF!	#REF!	#REF!	#REF!	#REF!	#REF!	#REF!	#REF!	#REF!	#REF!	#REF!	#REF!	#REF!	#REF!	#REF!	#REF!	#REF!	#REF!	#REF!	#REF!	#REF!	#REF!	#REF!	#REF!	#REF!	#REF!	#REF!	#REF!
	ƩCHFSEO, chosen HFSE oxides = (Zr, Nb, Ti, Y, U, Th, LREE)
	ƩLREO = (La, Ce, Nd, Sm)
	400 m wide aureole ellipsoid summary	Total Tonnage (Mt)	Total Rock (Gt)	SiO2	Al2O3	Fe2O3	CaO	MgO	Na2O	K2O	Cr2O3	TiO2	MnO	P2O5	LOI	H2O+ (calc)	0	BaO	Ce2O3	Cr2O3	Cs2O3	Dy2O3	Er2O3	Eu2O3	Ga2O3	Gd2O3	HfO2	Ho2O3	La2O3	Lu2O3	Nb2O5	Nd2O3	NiO2	Pr2O3	Rb2O	Sc2O3	Sm2O3	SnO2	SrO	Ta2O5	Tb2O3	ThO2	Tm2O3	UO2	V2O5	Y2O3	Yb2O3	ZrO2	SUM
	I4 ellipsoid (Mt)	570943	570.943	334224	92042.3	40898.5	26409.3	7879.01	40302.2	16341.7	#DIV/0!	4326.48	1471.76	2010.99	2835.68	7265.17	0	484.425	124.537	#DIV/0!	#DIV/0!	#DIV/0!	#DIV/0!	#DIV/0!	#DIV/0!	#DIV/0!	#DIV/0!	#DIV/0!	52.7311	#DIV/0!	46.6718	58.2538	4.9888	#DIV/0!	#DIV/0!	11.1653	5.89238	#DIV/0!	482.541	#DIV/0!	#DIV/0!	14.3254	#DIV/0!	2.39641	#DIV/0!	39.0555	#DIV/0!	248.482	577582
	Fenite (Mt)	144800	144.8	134143	3829.97	1334.23	635.052	445.539	925.687	2718.11	#DIV/0!	136.526	135.889	51.7144	453.018	615.268	0	43.8332	14.2347	2.11626	0.0190617	0.729051	0.382488	0.190621	0.664772	0.922425	0.499153	0.127081	7.64925	0.0449628	7.87415	6.61465	0.66333	1.76616	4.7031	#DIV/0!	1.15871	0.240404	17.7393	0.272024	0.121409	0.706855	0.0503762	0.247448	2.22954	3.8011	0.347398	22.0926	145566
	Unaltered reference (Mt)	144800	144.8	142673	844.668	256.779	86.8801	22.277	185.344	497.147	#DIV/0!	35.7174	14.48	55.5068	397.718	425.404	0	3.93396	1.06625	2.11626	0.00362859	0.137935	0.0905166	0.0280558	0.111223	0.157996	0.267529	0.0276448	0.56494	0.012294	0.684932	0.641801	#DIV/0!	0.147656	0.763264	#DIV/0!	0.136455	0.183838	1.21695	0.133201	0.0218887	0.249679	0.0127891	0.0417224	1.42174	0.936571	0.0935442	12.5964	145522
	ƩCHFSEO in I4 ellipsoid (Mt)	4918.82
	ƩCHFSEO in I4 ellipsoid, excl. Ti (Mt)	592.345
	ƩREO in I4 ellipsoid (Mt)	235.522
	ƩCHFSEO in Fenite (Mt)	200.905
	ƩCHFSEO in Fenite, excl. Ti (Mt)	64.3794
	ƩLREO in Fenite (Mt)	29.6573
	ƩHREO in Fenite (Mt)	5.60386	Diff
	TREO in Fenite (Mt)	38.1404
	ƩCHFSEO in Unaltered (Mt)	52.6361	148.269
	ƩCHFSEO in Unaltered, excl. Ti (Mt)	16.9187	47.4607
	ƩLREO in Unaltered (Mt)	2.40944	27.2478
	ƩHREO in Unaltered (Mt)	1.33318
	TREO in Unaltered (Mt)	4.07633
	% of total CHFSEO now in fenite (assuming I4+fenite=Total and fenite HFSE content results from 100% influx)	0.0292612		0.286406	0.0399486	0.0315923	0.0234819	0.0535211	0.0224529	0.14261	#DIV/0!	0.0305906	0.0845266	0.0250712	0.13775	0.0780754	#DIV/0!	0.0829768	0.102576	#DIV/0!	#DIV/0!	#DIV/0!	#DIV/0!	#DIV/0!	#DIV/0!	#DIV/0!	#DIV/0!	#DIV/0!	0.126684	#DIV/0!	0.144358	0.10197	0.117359	#DIV/0!	#DIV/0!	#DIV/0!	0.164331	#DIV/0!	0.0354588	#DIV/0!	#DIV/0!	0.0470227	#DIV/0!	0.0935936	#DIV/0!	0.0886934	#DIV/0!	0.0816507
																																																	SUM
	I4 scaled to Ilimaussaq size	316597	316.597	185332	51039	22678.9	14644.4	4369.04	22348.2	9061.71	#DIV/0!	2399.1	816.117	1115.13	1572.43	4028.65	0	268.622	69.0579	#DIV/0!	#DIV/0!	#DIV/0!	#DIV/0!	#DIV/0!	#DIV/0!	#DIV/0!	#DIV/0!	#DIV/0!	29.2403	#DIV/0!	25.8803	32.3027	2.76637	#DIV/0!	#DIV/0!	6.19136	3.26742	#DIV/0!	267.577	#DIV/0!	#DIV/0!	7.94364	#DIV/0!	1.32885	#DIV/0!	21.6569	#DIV/0!	137.787	320279
	Fenite (Mt)	108021	108.021	100070	2857.14	995.332	473.747	332.371	690.56	2027.7	#DIV/0!	101.848	101.373	38.5788	337.95	458.988	0	32.6994	10.619	1.57872	0.01422	0.543869	0.285335	0.142203	0.495918	0.688127	0.372367	0.094802	5.70632	0.0335421	5.8741	4.93451	0.494842	1.31755	3.5085	#DIV/0!	0.864394	0.179341	13.2335	0.202929	0.0905708	0.527312	0.0375805	0.184595	1.66323	2.83561	0.259158	16.481	108592
	Unaltered reference (Mt)	108021	108.021	106433	630.12	191.556	64.8123	16.6185	138.266	370.87	#DIV/0!	26.6451	10.8021	41.4079	296.696	317.35	0	2.93472	0.795417	1.57872	0.00270692	0.102899	0.0675251	0.0209295	0.0829721	0.117864	0.199575	0.0206229	0.421444	0.00917132	0.510957	0.478782	#DIV/0!	0.110151	0.569393	#DIV/0!	0.101795	0.137143	0.907842	0.0993676	0.0163289	0.18626	0.00954063	0.0311248	1.06061	0.698679	0.0697837	9.39687	108559
	ƩCHFSEO in I4 ellipsoid (Mt)	2727.57
	ƩCHFSEO in I4 ellipsoid, excl. Ti (Mt)	328.465
	ƩREO in I4 ellipsoid (Mt)	133.868
	ƩCHFSEO in Fenite (Mt)	149.875
	ƩCHFSEO in Fenite, excl. Ti (Mt)	48.0269
	ƩLREO in Fenite (Mt)	22.1242
	% of total oxide now in fenite (assuming I4+fenite=Total and fenite HFSE content results from 100% influx)	0.0520861		0.350628	0.053012	0.0420428	0.0313364	0.070696	0.0299738	0.18285	#DIV/0!	0.0407237	0.11049	0.033439	0.176902	0.102278	#DIV/0!	0.10852	0.133276	#DIV/0!	#DIV/0!	#DIV/0!	#DIV/0!	#DIV/0!	#DIV/0!	#DIV/0!	#DIV/0!	#DIV/0!	0.163287	#DIV/0!	0.184985	0.132516	0.151735	#DIV/0!	#DIV/0!	#DIV/0!	0.209204	#DIV/0!	0.047126	#DIV/0!	#DIV/0!	0.0622494	#DIV/0!	0.121971	#DIV/0!	0.115774	#DIV/0!	0.106833
	1% Mt Error Calc	Total Tonnage (Mt)	Total Rock (Gt)	SiO2	Al2O3	Fe2O3	CaO	MgO	Na2O	K2O	Cr2O3	TiO2	MnO	P2O5	LOI	H2O+ (calc)	0	BaO	Ce2O3	Cr2O3	Cs2O3	Dy2O3	Er2O3	Eu2O3	Ga2O3	Gd2O3	HfO2	Ho2O3	La2O3	Lu2O3	Nb2O5	Nd2O3	NiO2	Pr2O3	Rb2O	Sc2O3	Sm2O3	SnO2	SrO	Ta2O5	Tb2O3	ThO2	Tm2O3	UO2	V2O5	Y2O3	Yb2O3	ZrO2	SUM
	I4 ellipsoid (Mt)	576652	576.652	337566	92962.8	41307.5	26673.4	7957.8	40705.2	16505.1	#DIV/0!	4369.74	1486.48	2031.1	2864.04	7337.82	0	489.27	125.782	#DIV/0!	#DIV/0!	#DIV/0!	#DIV/0!	#DIV/0!	#DIV/0!	#DIV/0!	#DIV/0!	#DIV/0!	53.2585	#DIV/0!	47.1385	58.8363	5.03869	#DIV/0!	#DIV/0!	11.277	5.95131	#DIV/0!	487.366	#DIV/0!	#DIV/0!	14.4686	#DIV/0!	2.42037	#DIV/0!	39.4461	#DIV/0!	250.966	583358
	Fenite (Mt)	146248	146.248	135484	3868.27	1347.57	641.403	449.995	934.944	2745.29	#DIV/0!	137.891	137.248	52.2315	457.548	621.421	0	44.2715	14.377	2.13742	0.0192523	0.736341	0.386312	0.192527	0.67142	0.93165	0.504145	0.128352	7.72575	0.0454124	7.9529	6.6808	0.669963	1.78382	4.75013	#DIV/0!	1.1703	0.242808	17.9167	0.274744	0.122623	0.713924	0.0508799	0.249923	2.25184	3.83911	0.350872	22.3135	147022
	Unaltered reference (Mt)	146248	146.248	144099	853.115	259.347	87.7489	22.4997	187.198	502.119	#DIV/0!	36.0746	14.6248	56.0618	401.695	429.658	0	3.9733	1.07691	2.13742	0.00366487	0.139315	0.0914217	0.0283364	0.112335	0.159576	0.270204	0.0279212	0.57059	0.012417	0.691781	0.648219	#DIV/0!	0.149132	0.770897	#DIV/0!	0.13782	0.185677	1.22912	0.134533	0.0221076	0.252175	0.012917	0.0421396	1.43595	0.945937	0.0944796	12.7224	146978
	ƩCHFSEO in I4 ellipsoid (Mt)	4968.01
	ƩCHFSEO in I4 ellipsoid, excl. Ti (Mt)	598.269
	ƩREO in I4 ellipsoid (Mt)	237.877
	ƩCHFSEO in Fenite (Mt)	202.914
	ƩCHFSEO in Fenite, excl. Ti (Mt)	65.0232
	ƩLREO in Fenite (Mt)	29.9539
	% of total CHFSEO now in fenite (assuming I4+fenite=Total and fenite HFSE content results from 100% influx)
	1% Mt Diff per component	Total Tonnage (Mt)	Total Rock (Gt)	SiO2	Al2O3	Fe2O3	CaO	MgO	Na2O	K2O	Cr2O3	TiO2	MnO	P2O5	LOI	H2O+ (calc)	0	BaO	Ce2O3	Cr2O3	Cs2O3	Dy2O3	Er2O3	Eu2O3	Ga2O3	Gd2O3	HfO2	Ho2O3	La2O3	Lu2O3	Nb2O5	Nd2O3	NiO2	Pr2O3	Rb2O	Sc2O3	Sm2O3	SnO2	SrO	Ta2O5	Tb2O3	ThO2	Tm2O3	UO2	V2O5	Y2O3	Yb2O3	ZrO2	SUM
	I4 ellipsoid (Mt)			3342.24	920.423	408.985	264.093	78.7901	403.022	163.417	#DIV/0!	43.2648	14.7176	20.1099	28.3568	72.6517	0	4.84425	1.24537	#DIV/0!	#DIV/0!	#DIV/0!	#DIV/0!	#DIV/0!	#DIV/0!	#DIV/0!	#DIV/0!	#DIV/0!	0.527311	#DIV/0!	0.466718	0.582538	0.049888	#DIV/0!	#DIV/0!	0.111653	0.0589238	#DIV/0!	4.82541	#DIV/0!	#DIV/0!	0.143254	#DIV/0!	0.0239641	#DIV/0!	0.390555	#DIV/0!	2.48482
	Fenite (Mt)			1341.43	38.2997	13.3423	6.35052	4.45539	9.25687	27.1811	#DIV/0!	1.36526	1.35889	0.517144	4.53018	6.15268	0	0.438332	0.142347	0.0211626	0.000190617	0.00729051	0.00382488	0.00190621	0.00664772	0.00922425	0.00499153	0.00127081	0.0764925	0.000449628	0.0787415	0.0661465	0.0066333	0.0176616	0.047031	#DIV/0!	0.0115871	0.00240404	0.177393	0.00272024	0.00121409	0.00706855	0.000503762	0.00247448	0.0222954	0.038011	0.00347398	0.220926
	Unaltered reference (Mt)			1426.73	8.44668	2.56779	0.868801	0.22277	1.85344	4.97147	#DIV/0!	0.357174	0.1448	0.555068	3.97718	4.25404	0	0.0393396	0.0106625	0.0211626	3.62859e-05	0.00137935	0.000905166	0.000280558	0.00111223	0.00157996	0.00267529	0.000276448	0.0056494	0.00012294	0.00684932	0.00641801	#DIV/0!	0.00147656	0.00763264	#DIV/0!	0.00136455	0.00183838	0.0121695	0.00133201	0.000218887	0.00249679	0.000127891	0.000417224	0.0142174	0.00936571	0.000935442	0.125964
[truncated: 7 more columns]

## Sheet: DR2.3 Ilimaussaq
Unit (component wt% or ppm)	Ref		SiO2	Al2O3	Fe2O3	FeO	CaO	MgO	Na2O	K2O	Cr2O3	TiO2	MnO	P2O5	LOI	H2O+ (calc)	H2O-	CO2	S	Cl	F	Ba	Ce	Cr	Cs	Dy	Er	Eu	Ga	Gd	Hf	Ho	La	Lu	Nb	Nd	Ni	Pr	Rb	Sc	Sm	Sn	Sr	Ta	Tb	Th	Tm	U	V
Agpaitic phonolite (proxy for Black Madonna)	Larsen 1979		51.83	14.57	7.56	4.61	2.54	0.18	8.81	4.87		0.55	0.48	0.08		2.03				0.33	0.84		845					39.3			90		483		867	298			360		39.3		50		7.64	63		29
White Kakortokite	Bailey 2001		53.3	13.4	7.9	3.42	2.1	0.23	8.84	4.04		0.16	0.31	0.04		2.81	0.41	0.09	0.01	0.04	1.05	163	1460	3.9	5.5			7.18	37		248		743	9.26	894	573			542	1.2	105		108	56.6	21	6.4		23.4
Red Kakortokite	Bailey 2001		52.2	10.51	6.04	6.9	3.58	0.28	9.26	3.39		0.68	0.41	0.04		2.18	0.21	0.06	0.01	0.3	0.38	187	2640	3.5	3.9			18.3	41		594		1330	17.4	1890	717			314	1.9	199		193	18.7	34.2	59.4		20.6
Black kakortokite	Bailey 2001		48.06	8.16	7.17	17.08	4.39	0.58	6.95	2.79		0.57	0.48	0.01		1.66	0.15	0.05	0	0.04	2.07	112	429	1.8	4.4			2.95	29		123		415	2.68	419	246			186	18	72.1		177	6	4.91	5.6		2.3
Prop. Weighted kakortokite	Bailey 2001		52.4674	12.4063	7.6304	5.6456	2.5538	0.2835	8.6132	3.8065	0	0.2642	0.3428	0.0358	0	2.5923	0.3556	0.0817	0.0086	0.0634	1.1325	158.02	1421.86	3.57	5.202	0	0	7.5886	36.24	0	261.64	0	749.91	9.0714	917.14	540.18	0	0	471.64	3.615	108.854	0	125.31	46.105	19.9354	11.058	0	20.194	0
Transitional kakortokite-lujavrite (50-50 KK+AegLJV)			52.0787	11.6632	9.8402	3.8628	1.9519	0.14675	4.3066	3.30325	0	0.2571	0.1714	0.0279	0	1.45115	0.1778	0.04085	0.0043	0.0317	0.59625	79.01	710.93	1.785	2.601	0	0	3.7943	18.12	0	130.82	0	374.955	4.5357	458.57	270.09	0	0	235.82	1.8075	54.427	0	62.655	23.0525	9.9677	5.529	0	21.797	0
Aegirine lujavrite	Bailey 2005		51.69	10.92	12.05	2.08	1.35	0.01		2.8		0.25		0.02		0.31					0.06																											23.4
Aegirine lujavrite	Bailey 2001		53.24	15.08	8.83	2.2	0.79	0.19	11.52	3.32		0.17	0.21	0.03		1.98	0.15	0.09	0.04	0.05	0.04	68	1760	1.1	5.1			11.6	56		121		844	6.79	595	684			665	0.21	107		51	21.3	17.9	72.1		21.7
Arfvedsonite lujavrite	Bailey 2001		53.06	14.29	2.89	7.75	0.38	0.14	9.84	3.42		0.15	0.44	0.54		4.26	0.13	0.06	0.15	0.02	0.15	47	5040	1.8	7.4			17.3	58		60.6		3690	5.32	499	1570			551	0.52	176		61	19.2	23.1	63.5		124
Arfvedsonite lujavrite	Sorensen 2009		51.22	12.06	5.44	8.8	0.26	0.06	9.9	3.31		0.24	0.56	0.73					0.15		0.04	75	3900		12				101				3210		480	937			557				46			76		95
Villiaumite arfvedsonite lujavrite	Sorensen 2009		48.25	12.3	7.03	7.72	0.14	0.02	14.31	3.41		0.25	0.54	0.58					0.16		1.04	29	2350		8.6				115				2060		275	529			936				30			89		196
Naujakasite lujavrite	Sorensen 2009		50.02	13.12	4.27	9.4	0.19	0.03	12.41	3.28		0.22	0.7	0.48					0.21		0.48	32	3460		30				131				2490		428	899			971				33			970		358
M-C lujavrites	Bailey 2001		53.87	12.94	3.48	8.29	0.29	0.1	7.91	5.34		0.43	0.61	0.47		3.01	0.12	0.04	0.14	0	0.12	58	3960	1.9	82			8.63	66		7.7		2830	2.41	892	1150			1280	0.09	98.8		45	48.4	10.7	329		187
Weighted Average lujavrite			51.509	12.9595	6.4245	6.5215	0.4955	0.0775	11.216	3.465	#DIV/0!	0.235	0.46	0.404	#DIV/0!	3.2005	0.135	0.067	0.1265	0.027	0.2835	53.65	3136.5	1.6	18.43	#DIV/0!	#DIV/0!	14.723	84.15	#DIV/0!	73.43	#DIV/0!	2253.7	5.47	520	910.45	#DIV/0!	#DIV/0!	779.75	0.384	147.58	#DIV/0!	45.3	22.75	20.3	234.305	#DIV/0!	141.415	#DIV/0!
Naujaite	Bailey 2001		48.25	19.3	4.07	3.08	1.68	0.1	14.37	3.41		0.32	0.21	0.06		1.25	0.17	0.11	0.08	2.34	0.16	11	1180	8.2	6.2	0	0	9.63	23	0	76.2	0	594	5.24	742	540		0	334	40	96.1		10	3.9	16.1	41	0	19.5
Average naujaite			48.25	19.3	4.07	3.08	1.68	0.1	14.37	3.41	#DIV/0!	0.32	0.21	0.06	#DIV/0!	1.25	0.17	0.11	0.08	2.34	0.16	11	1180	8.2	6.2	0	0	9.63	23	0	76.2	0	594	5.24	742	540	#DIV/0!	0	334	40	96.1	#DIV/0!	10	3.9	16.1	41	0	19.5	#DIV/0!
Average Fenite			92.64	2.645	0.921429	0.921429	0.921429	0.307692	0.639286	1.87714	#DIV/0!	0.0942857	0.0938462	0.0357143	0.312857	0.424908	0.424908	0.424908	0.424908	0.424908	0.424908	271.129	83.9286	10	0.124167	4.38692	2.31	1.13692	3.41538	5.52692	2.92308	0.766154	45.0429	0.273077	38.0143	39.1643	3.6	10.4223	29.7	#DIV/0!	6.90077	1.30769	103.593	1.53846	0.728462	4.29	0.304615	1.50643	8.625
Intrusion (Mts of oxide or ppm)		Total Tonnage (Mt)	SiO2	Al2O3	Fe2O3	FeO	CaO	MgO	Na2O	K2O	Cr2O3	TiO2	MnO	P2O5	LOI	H2O+ (calc)	H2O-	CO2	S	Cl	F	Ba	Ce	Cr	Cs	Dy	Er	Eu	Ga	Gd	Hf	Ho	La	Lu	Nb	Nd	Ni	Pr	Rb	Sc	Sm	Sn	Sr	Ta	Tb	Th	Tm	U	V
Black Madonna		13032.2	6754.57	1898.79	985.232	600.783	331.017	23.4579	1148.13	634.666	0	71.6769	62.5544	10.4257	0	264.553	0	0	0	43.0061	109.47	0	110122	0	0	0	0	5121.64	0	0	11728.9	0	62945.3	0	112989	38835.8	0	0	46915.8	0	5121.64	0	6516.08	0	995.657	8210.26	0	3779.33	0
Weighted Kakortokite series (calc. as cap - floor)		36436.1	19117.1	4520.38	2780.22	2057.04	930.506	103.296	3138.32	1386.94	0	96.2643	124.903	13.0441	0	944.534	129.567	29.7683	3.13351	23.1005	412.639	57576.4	518071	1300.77	1895.41	0	0	2764.99	13204.5	0	95331.5	0	273238	3305.27	334170	196821	0	0	171847	1317.17	39662.2	0	45658.1	16798.9	7263.69	4029.11	0	7357.91	0
Transitional Kakortokite-Lujavrite		14532.1	7568.12	1694.9	1429.99	561.346	283.652	21.3258	625.839	480.031	0	37.362	24.908	4.05445	0	210.882	25.8381	5.93636	0.62488	4.60667	86.6476	11481.8	103313	259.398	377.98	0	0	551.391	2633.21	0	19010.9	0	54488.8	659.132	66639.8	39249.7	0	0	34269.6	262.668	7909.38	0	9105.08	3350.01	1448.52	803.479	0	3167.56	0
Weighted Lujavrite series		170516	87831.1	22098	10954.8	11120.2	844.907	132.15	19125.1	5908.38	#DIV/0!	400.713	784.374	688.885	#DIV/0!	5457.36	230.197	114.246	215.703	46.0393	483.413	1.93109	269.449	2424.5	6.08742	8.87024	0	0	12.9398	61.795	0	446.138	0	1278.72	15.4682	1563.87	921.093	0	0	804.222	6.16415	185.613	0	213.674	78.6164	33.993	18.8557	0	34.434
Naujaite series (calc. as cap - roof)		82080.7	39604	15841.6	3340.69	2528.09	1378.96	82.0807	11795	2798.95	#DIV/0!	262.658	172.37	49.2484	#DIV/0!	1026.01	139.537	90.2888	65.6646	1920.69	131.329	0.929564	129.704	1167.07	2.93028	4.26984	0	0	6.22878	29.7461	0	214.756	0	615.532	7.44587	752.795	443.384	0	0	387.126	2.96722	89.3482	0	102.855	37.8433	16.3631	9.07649	0	16.5754
			SiO2	Al2O3	Fe2O3	FeO	CaO	MgO	Na2O	K2O	Cr2O3	TiO2	MnO	P2O5	LOI	H2O+ (calc)	H2O-	CO2	S	Cl	F	BaO	Ce2O3	Cr2O3	Cs2O3	Dy2O3	Er2O3	Eu2O3	Ga2O3	Gd2O3	HfO2	Ho2O3	La2O3	Lu2O3	Nb2O5	Nd2O3	NiO2	Pr2O3	Rb2O	Sc2O3	Sm2O3	SnO2	SrO	Ta2O5	Tb2O3	ThO2	Tm2O3	UO2	V2O5
Kringlerne grade (Paulick & Machacek, 2017 after TMR, 2015)																							0.206913			0.019	0.016	0.002		0.017		0.004	0.116	0.002		0.08		0.023406			0.015				0.00293573		0.002
Kvanefjeld grade (Paulick & Machacek, 2017 after TMR, 2015)																							0.436711			0.012	0.006	0.001		0.012		0.002	0.299	0.002		0.134		0.035109			0.017				0.00195715		0.001
Component conversion to wt% oxide																						1.1165	1.1713	1.4615	1.0602	1.1477	1.1435	1.1579	1.3442	1.1526	1.1793	1.1455	1.1728	1.1371	1.4305	1.1664	1.2725	1.1703	1.0936	1.5338	1.1596	1.2696	1.1826	1.2211	1.151	1.1379	1.1421	1.1344	1.7852
			SiO2	Al2O3	Fe2O3	FeO	CaO	MgO	Na2O	K2O	Cr2O3	TiO2	MnO	P2O5	LOI	H2O+ (calc)	H2O-	CO2	S	Cl	F	BaO	Ce2O3	Cr2O3	Cs2O3	Dy2O3	Er2O3	Eu2O3	Ga2O3	Gd2O3	HfO2	Ho2O3	La2O3	Lu2O3	Nb2O5	Nd2O3	NiO2	Pr2O3	Rb2O	Sc2O3	Sm2O3	SnO2	SrO	Ta2O5	Tb2O3	ThO2	Tm2O3	UO2	V2O5
Black Madonna	Larsen 1979		51.83	14.57	7.56	4.61	2.54	0.18	8.81	4.87	0	0.55	0.48	0.08	0	2.03	0	0	0	0.33	0.84	0	0.0989749	0	0	0	0	0.00455055	0	0	0.0106137	0	0.0566462	0	0.124024	0.0347587	0	0	0.0393696	0	0.00455723	0	0.005913	0	0.000879364	0.00716877	0	0.00328976	0
White Kakortokite	Bailey 2001		53.3	13.4	7.9	3.42	2.1	0.23	8.84	4.04		0.16	0.31	0.04		2.81	0.41	0.09	0.01	0.04	1.05	0.018199	0.17101	0.000569985	0.00058311	0	0	0.000831372	0.00497354	0	0.0292466	0	0.087139	0.00105295	0.127887	0.0668347	0	0	0.0592731	0.000184056	0.0121758	0	0.0127721	0.00691143	0.0024171	0.000728256	0	0.0026545	0
Red Kakortokite	Bailey 2001		52.2	10.51	6.04	6.9	3.58	0.28	9.26	3.39		0.68	0.41	0.04		2.18	0.21	0.06	0.01	0.3	0.38	0.0208786	0.309223	0.000511525	0.000413478	0	0	0.00211896	0.00551122	0	0.0700504	0	0.155982	0.00197855	0.270365	0.0836309	0	0	0.034339	0.000291422	0.023076	0	0.0228242	0.00228346	0.00393642	0.00675913	0	0.00233686	0
Black kakortokite	Bailey 2001		48.06	8.16	7.17	17.08	4.39	0.58	6.95	2.79		0.57	0.48	0.01		1.66	0.15	0.05	0	0.04	2.07	0.0125048	0.0502488	0.00026307	0.000466488	0	0	0.000341581	0.00389818	0	0.0145054	0	0.0486712	0.000304743	0.059938	0.0286934	0	0	0.020341	0.00276084	0.00836072	0	0.020932	0.00073266	0.000565141	0.000637224	0	0.000260912	0
Kringlerne KKT (to account for HREE)	P&M, 2017																					0	0.206913	0	0	0.019	0.016	0.002	0	0.017	0	0.004	0.116	0.002	0	0.08	0	0.023406	0	0	0.015	0	0	0	0.00293573	0	0.002	0	0
Prop. Weighted kakortokite	Bailey 2001		52.4674	12.4063	7.6304	5.6456	2.5538	0.2835	8.6132	3.8065	0	0.2642	0.3428	0.0358	0	2.5923	0.3556	0.0817	0.0086	0.0634	1.1325	0.0176429	0.161939	0.000521756	0.000551516	0.000855	0.00072	0.000873331	0.00487138	0.000765	0.0308552	0.00018	0.0861502	0.00103247	0.131197	0.0628432	0	0.00105327	0.0515786	0.000554469	0.0122593	0	0.0148192	0.00562988	0.00224953	0.00125829	9e-05	0.00229081	0
Transitional kakortokite-lujavrite	calculated here		52.0787	11.6632	9.8402	3.8628	1.9519	0.14675	4.3066	3.30325	0	0.2571	0.1714	0.0279	0	1.45115	0.1778	0.04085	0.0043	0.0317	0.59625	0.00882147	0.0809693	0.000260878	0.000275758	0.0004275	0.00036	0.000436665	0.00243569	0.0003825	0.0154276	9e-05	0.0430751	0.000516237	0.0655984	0.0314216	0	0.000526635	0.0257893	0.000277234	0.00612964	0	0.00740958	0.00281494	0.00112477	0.000629145	4.5e-05	0.00247265	0
Aegirine lujavrite	Bailey 2005		51.69	10.92	12.05	2.08	1.35	0.01		2.8		0.25		0.02		0.31					0.06	0	0	0	0	0	0	0	0	0	0	0	0	0	0	0	0	0	0	0	0	0	0	0	0	0	0	0.0026545	0
Aegirine lujavrite	Bailey 2001		53.24	15.08	8.83	2.2	0.79	0.19	11.52	3.32		0.17	0.21	0.03		1.98	0.15	0.09	0.04	0.05	0.04	0.0075922	0.206149	0.000160765	0.000540702	0	0	0.00134316	0.00752752	0	0.0142695	0	0.0989843	0.000772091	0.0851148	0.0797818	0	0	0.0727244	3.22098e-05	0.0124077	0	0.00603126	0.00260094	0.00206029	0.00820426	0	0.00246165	0
Arfvedsonite lujavrite	Bailey 2001		53.06	14.29	2.89	7.75	0.38	0.14	9.84	3.42		0.15	0.44	0.54		4.26	0.13	0.06	0.15	0.02	0.15	0.00524755	0.590335	0.00026307	0.000784548	0	0	0.00200317	0.00779636	0	0.00714656	0	0.432763	0.000604937	0.0713819	0.183125	0	0	0.0602574	7.97576e-05	0.020409	0	0.00721386	0.00234451	0.00265881	0.00722566	0	0.0140666	0
Arfvedsonite lujavrite	Sorensen 2009		51.22	12.06	5.44	8.8	0.26	0.06	9.9	3.31		0.24	0.56	0.73					0.15		0.04	0.00837375	0.456807	0	0.00127224	0	0	0	0.0135764	0	0	0	0.376469	0	0.068664	0.109292	0	0	0.0609135	0	0	0	0.00543996	0	0	0.00864804	0	0.0107768	0
Villiaumite arfvedsonite lujavrite	Sorensen 2009		48.25	12.3	7.03	7.72	0.14	0.02	14.31	3.41		0.25	0.54	0.58					0.16		1.04	0.00323785	0.275255	0	0.000911772	0	0	0	0.0154583	0	0	0	0.241597	0	0.0393388	0.0617026	0	0	0.102361	0	0	0	0.0035478	0	0	0.0101273	0	0.0222342	0
Naujakasite lujavrite	Sorensen 2009		50.02	13.12	4.27	9.4	0.19	0.03	12.41	3.28		0.22	0.7	0.48					0.21		0.48	0.0035728	0.40527	0	0.0031806	0	0	0	0.017609	0	0	0	0.292027	0	0.0612254	0.104859	0	0	0.106189	0	0	0	0.00390258	0	0	0.110376	0	0.0406115	0
M-C lujavrites	Bailey 2001		53.87	12.94	3.48	8.29	0.29	0.1	7.91	5.34		0.43	0.61	0.47		3.01	0.12	0.04	0.14	0	0.12	0.0064757	0.463835	0.000277685	0.00869364	0	0	0.000999268	0.00887172	0	0.000908061	0	0.331902	0.000274041	0.127601	0.134136	0	0	0.139981	1.38042e-05	0.0114568	0	0.0053217	0.00591012	0.00123157	0.0374369	0	0.0212133	0
Kvanefjeld lujavrite (to account for HREE)	P&M, 2017																					0	0.436711	0	0	0.012	0.006	0.001	0	0.012	0	0.002	0.299	0.002	0	0.134	0	0.035109	0	0	0.017	0	0	0	0.00195715	0	0.001	0	0
Weighted Average lujavrite			51.509	12.9595	6.4245	6.5215	0.4955	0.0775	11.216	3.465	#DIV/0!	0.235	0.46	0.404	#DIV/0!	3.2005	0.135	0.067	0.1265	0.027	0.2835	0.00485119	0.337031	9.13438e-05	0.00187284	0.00144	0.00072	0.000661781	0.0101823	0.00144	0.00330322	0.00024	0.245061	0.00045581	0.0616188	0.0942276	0	0.00421308	0.0743648	1.81755e-05	0.00749592	0	0.00445249	0.00133283	0.000986116	0.0254309	0.00012	0.0160421	0
Naujaite	Bailey 2001		48.25	19.3	4.07	3.08	1.68	0.1	14.37	3.41		0.32	0.21	0.06		1.25	0.17	0.11	0.08	2.34	0.16	0.00122815	0.138213	0.00119843	0.000657324	0	0	0.00111506	0.00309166	0	0.00898627	0	0.0696643	0.00059584	0.106143	0.0629856	0	0	0.0365262	0.0061352	0.0111438	0	0.0011826	0.000476229	0.00185311	0.00466539	0	0.00221208	0
Average naujaite			48.25	19.3	4.07	3.08	1.68	0.1	14.37	3.41	#DIV/0!	0.32	0.21	0.06	#DIV/0!	1.25	0.17	0.11	0.08	2.34	0.16	0.000122815	0.0138213	0.000119843	6.57324e-05	0	0	0.000111506	0.000309166	0	0.000898627	0	0.00696643	5.9584e-05	0.0106143	0.00629856	#DIV/0!	0	0.00365262	0.00061352	0.00111438	#DIV/0!	0.00011826	4.76229e-05	0.000185311	0.000466539	0	0.000221208	#DIV/0!
Average Fenite			92.64	2.645	0.921429	0.921429	0.921429	0.307692	0.639286	1.87714	#DIV/0!	0.0942857	0.0938462	0.0357143	0.312857	0.424908	0.424908	0.424908	0.424908	0.424908	0.424908	0.0302715	0.00983055	0.0014615	1.31641e-05	0.000503487	0.000264148	0.000131644	0.000459096	0.000637033	0.000344718	8.77629e-05	0.00528263	3.10516e-05	0.00543794	0.00456812	0.0004581	0.00121972	0.00324799	#DIV/0!	0.000800213	0.000166025	0.0122509	0.000187862	8.38459e-05	0.000488159	3.47901e-05	0.000170889	0.00153973
Intrusion (Mt's of oxide)		Total Tonnage (Mt)	SiO2	Al2O3	Fe2O3	FeO	CaO	MgO	Na2O	K2O	Cr2O3	TiO2	MnO	P2O5	LOI	H2O+ (calc)	H2O-	CO2	S	Cl	F	BaO	Ce2O3	Cr2O3	Cs2O3	Dy2O3	Er2O3	Eu2O3	Ga2O3	Gd2O3	HfO2	Ho2O3	La2O3	Lu2O3	Nb2O5	Nd2O3	NiO2	Pr2O3	Rb2O	Sc2O3	Sm2O3	SnO2	SrO	Ta2O5	Tb2O3	ThO2	Tm2O3	UO2	V2O5
Black Madonna		13032.2	6837.64	1616.81	994.406	735.744	332.815	36.9462	1122.49	496.069	0	34.431	44.6743	4.66551	0	337.833	46.3424	10.6473	1.12077	8.26239	147.589	2.29926	21.1041	0.067996	0.0718745	0.111425	0.0938316	0.113814	0.634846	0.099696	4.0211	0.0234579	11.2272	0.134554	17.0978	8.18983	0	0.137264	6.7218	0.0722593	1.59765	0	1.93126	0.733695	0.293163	0.163982	0.0117289	0.298542	0
Weighted Kakortokite series		36436.1	19117.1	4520.38	2780.22	2057.04	930.506	103.296	3138.32	1386.94	0	96.2643	124.903	13.0441	0	944.534	129.567	29.7683	3.13351	23.1005	412.639	6.4284	59.0041	0.190108	0.200951	0.311529	0.26234	0.318208	1.77494	0.278736	11.2424	0.0655851	31.3898	0.376194	47.8031	22.8976	0	0.383771	18.7932	0.202027	4.46681	0	5.39953	2.05131	0.819643	0.458472	0.0327925	0.834682	0
Transitional Kakortokite-Lujavrite		14532.1	7624.61	1802.89	1108.86	820.424	371.121	41.1985	1251.68	553.164	0	38.3938	49.816	5.20249	0	376.715	51.6761	11.8727	1.24976	9.21335	164.576	2.56389	23.5331	0.075822	0.0801468	0.124249	0.104631	0.126913	0.707913	0.11117	4.48391	0.0261578	12.5194	0.15004	19.0656	9.13243	0	0.153062	7.49544	0.0805759	1.78153	0	2.15353	0.81814	0.326904	0.182856	0.0130789	0.332902	0
Weighted Lujavrite series		170516	87831.1	22098	10954.8	11120.2	844.907	132.15	19125.1	5908.38	#DIV/0!	400.713	784.374	688.885	#DIV/0!	5457.36	230.197	114.246	215.703	46.0393	483.413	8.27206	574.692	0.155756	3.1935	2.45543	1.22772	1.12844	17.3625	2.45543	5.63252	0.409238	417.868	0.777229	105.07	160.673	0	7.18398	126.804	0.0309922	12.7817	0	7.59221	2.27269	1.68149	43.3638	0.204619	27.3544	0
Naujaite series		82080.7	39604	15841.6	3340.69	2528.09	1378.96	82.0807	11795	2798.95	#DIV/0!	262.658	172.37	49.2484	#DIV/0!	1026.01	139.537	90.2888	65.6646	1920.69	131.329	0.100807	11.3447	0.098368	0.0539536	0	0	0.0915248	0.253766	0	0.737599	0	5.7181	0.048907	8.7123	5.1699	#DIV/0!	0	2.9981	0.503582	0.914688	#DIV/0!	0.0970687	0.0390892	0.152105	0.382939	0	0.181569	#DIV/0!
Total		316597	161014	45879.7	19179	17261.5	3858.31	395.672	36432.6	11143.5	#DIV/0!	832.46	1176.14	761.045	#DIV/0!	8142.46	597.319	256.823	286.871	2007.3	1339.55	19.6644	689.678	0.588049	3.60042	3.00263	1.68852	1.7789	20.7339	2.94503	26.1176	0.524439	478.722	1.48692	197.749	206.063	#DIV/0!	7.85807	162.812	0.889436	21.5424	#DIV/0!	17.1736	5.91493	3.2733	44.5521	0.26222	29.0021	#DIV/0!
ƩCHFSEO, chosen HFSE oxides = (Zr, Nb, Ti, Y, U, Th, REE)
TREO
ƩCHFSEO in the whole agpaite package (Mt)		4237.13
ƩCHFSEO (excl. Ti) in the whole agpaite package (Mt)		3404.67
TREO in the whole agpaite package (Mt)		1638.18
ƩLREO in the whole agpaite package (Mt)		1396.01
ƩCHFSEO in kakortokite (Mt)		881.619
ƩCHFSEO (excl. Ti) in kakortokite (Mt)		785.355
TREO in kakortokite (Mt)		155.723
ƩLREO in kakortokite (Mt)		117.758
Kringlerne kakortokite (SE Ilimaussaq) prospect info
Kvanefjeld lujavrite (NW Ilimaussaq) prospect info
Motzfeldt Sø REE prospect info
1% Error Calc
Intrusion (Mt's of oxide)		Total Tonnage (Mt)	SiO2	Al2O3	Fe2O3	FeO	CaO	MgO	Na2O	K2O	Cr2O3	TiO2	MnO	P2O5	LOI	H2O+ (calc)	H2O-	CO2	S	Cl	F	BaO	Ce2O3	Cr2O3	Cs2O3	Dy2O3	Er2O3	Eu2O3	Ga2O3	Gd2O3	HfO2	Ho2O3	La2O3	Lu2O3	Nb2O5	Nd2O3	NiO2	Pr2O3	Rb2O	Sc2O3	Sm2O3	SnO2	SrO	Ta2O5	Tb2O3	ThO2	Tm2O3	UO2	V2O5
Black Madonna		13162.5	6906.01	1632.98	1004.35	743.101	336.144	37.3156	1133.71	501.03	0	34.7753	45.121	4.71217	0	341.211	46.8058	10.7538	1.13197	8.34502	149.065	2.32225	21.3151	0.068676	0.0725932	0.112539	0.0947699	0.114952	0.641195	0.100693	4.06131	0.0236925	11.3395	0.135899	17.2688	8.27173	0	0.138637	6.78902	0.0729819	1.61363	0	1.95057	0.741032	0.296094	0.165622	0.0118462	0.301527	0
Weighted Kakortokite series		36800.5	19308.3	4565.58	2808.03	2077.61	939.811	104.329	3169.7	1400.81	0	97.2269	126.152	13.1746	0	953.979	130.863	30.066	3.16484	23.3315	416.766	6.49269	59.5942	0.192009	0.202961	0.314644	0.264964	0.32139	1.79269	0.281524	11.3549	0.0662409	31.7037	0.379956	48.2811	23.1266	0	0.387609	18.9812	0.204047	4.51148	0	5.45353	2.07182	0.82784	0.463057	0.0331205	0.843029	0
Transitional Kakortokite-Lujavrite		14677.4	7700.86	1820.92	1119.95	828.628	374.832	41.6105	1264.19	558.696	0	38.7777	50.3142	5.25451	0	380.483	52.1929	11.9914	1.26226	9.30548	166.222	2.58953	23.7684	0.0765802	0.0809483	0.125492	0.105677	0.128182	0.714993	0.112282	4.52875	0.0264193	12.6446	0.15154	19.2563	9.22376	0	0.154593	7.5704	0.0813817	1.79935	0	2.17507	0.826321	0.330173	0.184684	0.0132097	0.336231	0
Weighted Lujavrite series		172221	88709.4	22319	11064.3	11231.4	853.356	133.471	19316.3	5967.46	#DIV/0!	404.72	792.217	695.774	#DIV/0!	5511.94	232.499	115.388	217.86	46.4997	488.247	8.35478	580.439	0.157313	3.22543	2.47998	1.23999	1.13973	17.5361	2.47998	5.68884	0.413331	422.046	0.785002	106.121	162.28	0	7.25582	128.072	0.0313021	12.9096	0	7.66813	2.29542	1.6983	43.7974	0.206665	27.6279	0
Naujaite series		82901.5	40000	16000	3374.09	2553.37	1392.75	82.9015	11913	2826.94	#DIV/0!	265.285	174.093	49.7409	#DIV/0!	1036.27	140.933	91.1917	66.3212	1939.9	132.642	0.101816	11.4581	0.0993517	0.0544932	0	0	0.09244	0.256303	0	0.744975	0	5.77528	0.0493961	8.79943	5.2216	#DIV/0!	0	3.02808	0.508618	0.923835	#DIV/0!	0.0980394	0.0394801	0.153626	0.386768	0	0.183385	#DIV/0!
Total		319763	162625	46338.5	19370.8	17434.1	3896.89	399.628	36796.9	11254.9	#DIV/0!	840.785	1187.9	768.656	#DIV/0!	8223.88	603.292	259.391	289.74	2027.38	1352.94	19.8611	696.575	0.59393	3.63643	3.03266	1.7054	1.79669	20.9413	2.97448	26.3787	0.529684	483.509	1.50179	199.726	208.124	#DIV/0!	7.93665	164.441	0.89833	21.7578	#DIV/0!	17.3453	5.97407	3.30603	44.9976	0.264842	29.2921	#DIV/0!
ƩCHFSEO, chosen HFSE oxides = (Zr, Nb, Ti, Y, U, Th, REE)
TREO
ƩCHFSEO in the whole agpaite package (Mt)		4279.5
ƩCHFSEO (excl. Ti) in the whole agpaite package (Mt)		3438.72
TREO in the whole agpaite package (Mt)		1654.57
ƩCHFSEO in kakortokite (Mt)		890.435
ƩCHFSEO (excl. Ti) in kakortokite (Mt)		793.208
TREO in kakortokite (Mt)		157.28
[truncated: 11 more columns]

## Sheet: DR2.4 HFSE Plotting
		Total Tonnage (Mt)	Total Rock (Gt)	SiO2	Al2O3	Fe2O3	FeO	CaO	MgO	Na2O	K2O	Cr2O3	TiO2	MnO	P2O5	LOI	H2O+ (calc)	H2O-	CO2	S	Cl	F	BaO	Ce2O3	Cr2O3	Cs2O3	Dy2O3	Er2O3	Eu2O3	Ga2O3	Gd2O3	HfO2	Ho2O3	La2O3	Lu2O3	Nb2O5	Nd2O3	NiO2	Pr2O3	Rb2O	Sc2O3	Sm2O3	SnO2	SrO	Ta2O5	Tb2O3	ThO2	Tm2O3	UO2
Ellip1	I4 intrusion ellipsoid 1	570943	570.943	334224	92042.3	40898.5		26409.3	7879.01	40302.2	16341.7	#DIV/0!	4326.48	1471.76	2010.99	2835.68	7265.17						484.425	124.537	#DIV/0!	#DIV/0!	#DIV/0!	#DIV/0!	#DIV/0!	#DIV/0!	#DIV/0!	#DIV/0!	#DIV/0!	52.7311	#DIV/0!	46.6718	58.2538	4.9888	#DIV/0!	#DIV/0!	11.1653	5.89238	#DIV/0!	482.541	#DIV/0!	#DIV/0!	14.3254	#DIV/0!	2.39641
	Fenite carapace (200 m), ellipsoid 1	80480.8	80.4808	74557.5	2128.72	741.574		352.966	247.633	514.503	1510.74	#DIV/0!	75.8819	75.5282	28.7432	251.79	341.97						24.3628	7.91171	1.17623	0.0105946	0.405211	0.212589	0.105948	0.369484	0.51269	0.277432	0.0706323	4.2515	0.0249906	4.3765	3.67646	0.368683	0.981643	2.61401	#DIV/0!	0.644018	0.133618	9.85962	0.151193	0.0674799	0.392875	0.0279994	0.137533
	Fenite carapace (400 m), ellipsoid 1	144800	144.8	134143	3829.97	1334.23		635.052	445.539	925.687	2718.11	#DIV/0!	136.526	135.889	51.7144	453.018	615.268						43.8332	14.2347	2.11626	0.0190617	0.729051	0.382488	0.190621	0.664772	0.922425	0.499153	0.127081	7.64925	0.0449628	7.87415	6.61465	0.66333	1.76616	4.7031	#DIV/0!	1.15871	0.240404	17.7393	0.272024	0.121409	0.706855	0.0503762	0.247448
	I4 scaled to Ilim (Mt)	283060	283.06	262226	7486.93	2608.19		1241.42	870.953	1809.56	5313.43	#DIV/0!	266.885	265.641	101.093	885.572	1202.74						85.6864	27.8263	4.13692	0.0372624	1.42517	0.747698	0.372632	1.29952	1.80318	0.975759	0.248421	14.953	0.0878945	15.3926	12.9305	1.2967	3.45254	9.19375	#DIV/0!	2.26508	0.469949	34.6773	0.53176	0.237334	1.38178	0.0984768	0.483718
	Fenite scaled (Mt)	60360.6	60.3606	55918.1	1596.54	556.18		264.725	185.725	385.877	1133.06	#DIV/0!	56.9115	56.6461	21.5574	188.843	256.477						18.2721	5.93378	0.882171	0.00794596	0.303908	0.159442	0.0794614	0.277113	0.384517	0.208074	0.0529743	3.18863	0.0187429	3.28238	2.75735	0.276512	0.736232	1.96051	#DIV/0!	0.483014	0.100214	7.39472	0.113394	0.0506099	0.294656	0.0209995	0.10315
	Fenite carapace (800 m), ellipsoid 1	108600	108.6	100607	2872.47	1000.67		476.289	334.154	694.265	2038.58	#DIV/0!	102.394	101.917	38.7858	339.763	461.451						32.8749	10.676	1.58719	0.0142963	0.546788	0.286866	0.142966	0.498579	0.691819	0.374365	0.0953107	5.73694	0.0337221	5.90562	4.96099	0.497497	1.32462	3.52732	#DIV/0!	0.869033	0.180303	13.3045	0.204018	0.0910568	0.530142	0.0377821	0.185586
	Unaltered Reference (Mt) ellipsoid 1	144800	144.8	142673	844.668	256.779		86.8801	22.277	185.344	497.147	#DIV/0!	35.7174	14.48	55.5068	397.718	425.404						3.93396	1.06625	2.11626	0.00362859	0.137935	0.0905166	0.0280558	0.111223	0.157996	0.267529	0.0276448	0.56494	0.012294	0.684932	0.641801	#DIV/0!	0.147656	0.763264	#DIV/0!	0.136455	0.183838	1.21695	0.133201	0.0218887	0.249679	0.0127891	0.0417224
	Unaltered Reference (Ilim size, Mt)	108021	108.021	106433	630.12	191.556		64.8123	16.6185	138.266	370.87	#DIV/0!	26.6451	10.8021	41.4079	296.696	317.35						2.93472	0.795417	1.57872	0.00270692	0.102899	0.0675251	0.0209295	0.0829721	0.117864	0.199575	0.0206229	0.421444	0.00917132	0.510957	0.478782	#DIV/0!	0.110151	0.569393	#DIV/0!	0.101795	0.137143	0.907842	0.0993676	0.0163289	0.18626	0.00954063	0.0311248
Ellip 2	I4 ellipsoid 2 long z-axis	1.14189e+06	1141.89	668447	184085	81797.1		52818.6	15758	80604.4	32683.3	#DIV/0!	8652.96	2943.53	4021.98	5671.37	14530.3						968.851	249.074	#DIV/0!	#DIV/0!	#DIV/0!	#DIV/0!	#DIV/0!	#DIV/0!	#DIV/0!	#DIV/0!	#DIV/0!	105.462	#DIV/0!	93.3436	116.508	9.97761	#DIV/0!	#DIV/0!	22.3307	11.7848	#DIV/0!	965.082	#DIV/0!	#DIV/0!	28.6507	#DIV/0!	4.79281
	Fenite carapace, ellipsoid 2 long z axis (200m)	120248	120.248	111397	3180.55	1108		527.372	369.993	768.726	2257.22	#DIV/0!	113.376	112.848	42.9456	376.204	510.942						36.4008	11.821	1.75742	0.0158296	0.605432	0.317633	0.158299	0.552052	0.766018	0.414516	0.105533	6.35224	0.0373388	6.539	5.49306	0.550855	1.46669	3.90564	#DIV/0!	0.962238	0.199641	14.7314	0.225899	0.100823	0.587	0.0418343	0.20549
	Fenite carapace, ellipsoid 2 long z axis (400m)	205395	205.395	190278	5432.71	1892.57		900.805	631.986	1313.06	3855.56	#DIV/0!	193.659	192.756	73.3555	642.594	872.742						62.1763	20.1915	3.00185	0.0270386	1.03414	0.542549	0.270391	0.942962	1.30844	0.708036	0.180261	10.8503	0.0637785	11.1693	9.38271	0.940916	2.50525	6.67123	#DIV/0!	1.6436	0.341007	25.1628	0.385859	0.172216	1.00266	0.0714573	0.350999
	Fenite carapace, ellipsoid 2 long z axis (800m)	386329	386.329	357895	10218.4	3559.75		1694.33	1188.71	2469.75	7251.95	#DIV/0!	364.253	362.555	137.975	1208.66	1641.54						116.948	37.9783	5.6462	0.050857	1.94512	1.02048	0.50858	1.77362	2.46105	1.33175	0.339054	20.4083	0.119961	21.0084	17.648	1.76977	4.71214	12.5479	#DIV/0!	3.09146	0.641402	47.3288	0.725764	0.323921	1.8859	0.134404	0.660195
	Unaltered Reference ellipsoid 2	205395	205.395	202377	1198.14	364.234		123.237	31.5993	262.906	705.191	#DIV/0!	50.6642	20.5395	78.7349	564.153	603.424						5.58022	1.51244	3.00185	0.00514706	0.195658	0.128395	0.0397964	0.157767	0.224113	0.379482	0.0392134	0.801353	0.0174388	0.971558	0.910378	#DIV/0!	0.209446	1.08267	#DIV/0!	0.193558	0.26077	1.72621	0.188942	0.0310485	0.354163	0.018141	0.0591821
Cylinder	I4 cylinder	428207	428.207	250668	69031.7	30673.9		19807	5909.26	30226.7	12256.2	#DIV/0!	3244.86	1103.82	1508.24	2126.76	5448.87						363.319	93.4028	#DIV/0!	#DIV/0!	#DIV/0!	#DIV/0!	#DIV/0!	#DIV/0!	#DIV/0!	#DIV/0!	#DIV/0!	39.5484	#DIV/0!	35.0038	43.6903	3.7416	#DIV/0!	#DIV/0!	8.374	4.41929	#DIV/0!	361.906	#DIV/0!	#DIV/0!	10.744	#DIV/0!	1.79731
	Fenite carapace cyllinder (200m)	60360.6	60.3606	55918.1	1596.54	556.18		264.725	185.725	385.877	1133.06	#DIV/0!	56.9115	56.6461	21.5574	188.843	256.477						18.2721	5.93378	0.882171	0.00794596	0.303908	0.159442	0.0794614	0.277113	0.384517	0.208074	0.0529743	3.18863	0.0187429	3.28238	2.75735	0.276512	0.736232	1.96051	#DIV/0!	0.483014	0.100214	7.39472	0.113394	0.0506099	0.294656	0.0209995	0.10315
	Fenite carapace cylinder (400m)	108600	108.6	100607	2872.47	1000.67		476.289	334.154	694.265	2038.58	#DIV/0!	102.394	101.917	38.7858	339.763	461.451						32.8749	10.676	1.58719	0.0142963	0.546788	0.286866	0.142966	0.498579	0.691819	0.374365	0.0953107	5.73694	0.0337221	5.90562	4.96099	0.497497	1.32462	3.52732	#DIV/0!	0.869033	0.180303	13.3045	0.204018	0.0910568	0.530142	0.0377821	0.185586
	Fenite carapace cylinder (800 m)	212295	212.295	196670	5615.19	1956.14		931.064	653.214	1357.17	3985.07	#DIV/0!	200.164	199.23	75.8195	664.179	902.057						64.2648	20.8697	3.10269	0.0279468	1.06888	0.560773	0.279474	0.974636	1.35239	0.731819	0.186316	11.2147	0.0659209	11.5445	9.69788	0.972522	2.58941	6.89531	#DIV/0!	1.69881	0.352461	26.008	0.39882	0.178	1.03634	0.0738576	0.362789
	Unaltered Reference cylinder	108600	108.6	107004	633.501	192.584		65.1601	16.7077	139.008	372.861	#DIV/0!	26.788	10.86	41.6301	298.288	319.053						2.95047	0.799685	1.58719	0.00272144	0.103452	0.0678874	0.0210419	0.0834173	0.118497	0.200646	0.0207336	0.423705	0.00922053	0.513699	0.481351	#DIV/0!	0.110742	0.572448	#DIV/0!	0.102341	0.137879	0.912713	0.0999008	0.0164165	0.187259	0.00959183	0.0312918
	Mean I4 (global)			417779	115053	51123.2	#DIV/0!	33011.6	9848.76	50377.8	20427.1	#DIV/0!	5408.1	1839.7	2513.73	3544.6	9081.46						605.532	155.671	#DIV/0!	#DIV/0!	#DIV/0!	#DIV/0!	#DIV/0!	#DIV/0!	#DIV/0!	#DIV/0!	#DIV/0!	65.9139	#DIV/0!	58.3397	72.8172	6.236	#DIV/0!	#DIV/0!	13.9567	7.36548	#DIV/0!	603.176	#DIV/0!	#DIV/0!	17.9067	#DIV/0!	2.99551
	MIN
	MAX
	Mean Fenite (global)			146897	4194.11	1461.09	#DIV/0!	695.433	487.901	1013.7	2976.54	#DIV/0!	149.507	148.81	56.6313	496.09	673.767	#DIV/0!	#DIV/0!	#DIV/0!	#DIV/0!	#DIV/0!	48.0008	15.5881	2.31747	0.0208741	0.798368	0.418854	0.208745	0.727978	1.01013	0.546612	0.139164	8.37654	0.0492378	8.62282	7.24357	0.726399	1.93409	5.15027	#DIV/0!	1.26888	0.263261	19.426	0.297888	0.132953	0.774063	0.0551659	0.270975
	MIN			55918.1	1596.54	556.18	0	264.725	185.725	385.877	1133.06	#DIV/0!	56.9115	56.6461	21.5574	188.843	256.477	0	0	0	0	0	18.2721	5.93378	0.882171	0.00794596	0.303908	0.159442	0.0794614	0.277113	0.384517	0.208074	0.0529743	3.18863	0.0187429	3.28238	2.75735	0.276512	0.736232	1.96051	#DIV/0!	0.483014	0.100214	7.39472	0.113394	0.0506099	0.294656	0.0209995	0.10315
	MAX			357895	10218.4	3559.75	0	1694.33	1188.71	2469.75	7251.95	#DIV/0!	364.253	362.555	137.975	1208.66	1641.54	0	0	0	0	0	116.948	37.9783	5.6462	0.050857	1.94512	1.02048	0.50858	1.77362	2.46105	1.33175	0.339054	20.4083	0.119961	21.0084	17.648	1.76977	4.71214	12.5479	#DIV/0!	3.09146	0.641402	47.3288	0.725764	0.323921	1.8859	0.134404	0.660195
	Mean Unaltered (global)			150685	892.103	271.199	#DIV/0!	91.7592	23.528	195.753	525.066	#DIV/0!	37.7232	15.2932	58.6239	420.053	449.293	#DIV/0!	#DIV/0!	#DIV/0!	#DIV/0!	#DIV/0!	4.15488	1.12613	2.2351	0.00383236	0.145682	0.0955998	0.0296314	0.117469	0.166868	0.282552	0.0291973	0.596666	0.0129845	0.723397	0.677843	#DIV/0!	0.155948	0.806127	#DIV/0!	0.144118	0.194162	1.28529	0.140681	0.0231179	0.2637	0.0135073	0.0440654
	MIN			107004	633.501	192.584	0	65.1601	16.7077	139.008	372.861	#DIV/0!	26.788	10.86	41.6301	298.288	319.053	0	0	0	0	0	2.95047	0.799685	1.58719	0.00272144	0.103452	0.0678874	0.0210419	0.0834173	0.118497	0.200646	0.0207336	0.423705	0.00922053	0.513699	0.481351	#DIV/0!	0.110742	0.572448	#DIV/0!	0.102341	0.137879	0.912713	0.0999008	0.0164165	0.187259	0.00959183	0.0312918
	MAX			202377	1198.14	364.234	0	123.237	31.5993	262.906	705.191	#DIV/0!	50.6642	20.5395	78.7349	564.153	603.424	0	0	0	0	0	5.58022	1.51244	3.00185	0.00514706	0.195658	0.128395	0.0397964	0.157767	0.224113	0.379482	0.0392134	0.801353	0.0174388	0.971558	0.910378	#DIV/0!	0.209446	1.08267	#DIV/0!	0.193558	0.26077	1.72621	0.188942	0.0310485	0.354163	0.018141	0.0591821
																							19.6644	689.678	0.588049	3.60042	3.00263	1.68852	1.7789	20.7339	2.94503	26.1176	0.524439	478.722	1.48692	197.749	206.063	#DIV/0!	7.85807	162.812	0.889436	21.5424	#DIV/0!	17.1736	5.91493	3.2733	44.5521	0.26222	29.0021
	Ilimaussaq (Mt)	316597	316.597	161014	45879.7	19179	17261.5	3858.31	395.672	36432.6	11143.5	#DIV/0!	832.46	1176.14	761.045	#DIV/0!	8142.46	597.319	256.823	286.871	2007.3	1339.55	6.4284	59.0041	0.190108	0.200951	0.311529	0.26234	0.318208	1.77494	0.278736	11.2424	0.0655851	31.3898	0.376194	47.8031	22.8976	0	0.383771	18.7932	0.202027	4.46681	0	5.39953	2.05131	0.819643	0.458472	0.0327925	0.834682
	Kakortokite (Mt)	36436.1	36.4361	19117.1	4520.38	2780.22	2057.04	930.506	103.296	3138.32	1386.94	0	96.2643	124.903	13.0441	0	944.534	129.567	29.7683	3.13351	23.1005	412.639	8.27206	574.692	0.155756	3.1935	2.45543	1.22772	1.12844	17.3625	2.45543	5.63252	0.409238	417.868	0.777229	105.07	160.673	0	7.18398	126.804	0.0309922	12.7817	0	7.59221	2.27269	1.68149	43.3638	0.204619	27.3544
	Wt lujavrite (Mt)	170516	170.516	87831.1	22098	10954.8	11120.2	844.907	132.15	19125.1	5908.38	#DIV/0!	400.713	784.374	688.885	#DIV/0!	5457.36	230.197	114.246	215.703	46.0393	483.413
																							4.84425	1.24537	#DIV/0!	#DIV/0!	#DIV/0!	#DIV/0!	#DIV/0!	#DIV/0!	#DIV/0!	#DIV/0!	#DIV/0!	0.527311	#DIV/0!	0.466718	0.582538	0.049888	#DIV/0!	#DIV/0!	0.111653	0.0589238	#DIV/0!	4.82541	#DIV/0!	#DIV/0!	0.143254	#DIV/0!	0.0239641
	I4 error			3342.24	920.423	408.985		264.093	78.7901	403.022	163.417	#DIV/0!	43.2648	14.7176	20.1099	28.3568	72.6517						0.438332	0.142347	0.0211626	0.000190617	0.00729051	0.00382488	0.00190621	0.00664772	0.00922425	0.00499153	0.00127081	0.0764925	0.000449628	0.0787415	0.0661465	0.0066333	0.0176616	0.047031	#DIV/0!	0.0115871	0.00240404	0.177393	0.00272024	0.00121409	0.00706855	0.000503762	0.00247448
	Fenite error			1341.43	38.2997	13.3423		6.35052	4.45539	9.25687	27.1811	#DIV/0!	1.36526	1.35889	0.517144	4.53018	6.15268						0.0393396	0.0106625	0.0211626	3.62859e-05	0.00137935	0.000905166	0.000280558	0.00111223	0.00157996	0.00267529	0.000276448	0.0056494	0.00012294	0.00684932	0.00641801	#DIV/0!	0.00147656	0.00763264	#DIV/0!	0.00136455	0.00183838	0.0121695	0.00133201	0.000218887	0.00249679	0.000127891	0.000417224
	Unaltered error			1426.73	8.44668	2.56779		0.868801	0.22277	1.85344	4.97147	#DIV/0!	0.357174	0.1448	0.555068	3.97718	4.25404
	HFSE (ordered)	ThO2	UO2	Nb2O5	Ta2O5	La2O3	Ce2O3	Pr2O3	Nd2O3	Pm2O3	Sm2O3	ZrO2	HfO2	Eu2O3	TiO2	Gd2O3	Tb2O3	Dy2O3	Y2O3	Ho2O3	Er2O3	Tm2O3	Yb2O3	Lu2O3
	I4 Illerfissalik	17.9067	2.99551	58.3397	#DIV/0!	65.9139	155.671	#DIV/0!	72.8172		7.36548	310.602	#DIV/0!	#DIV/0!	5408.1	#DIV/0!	#DIV/0!	#DIV/0!	48.8194	#DIV/0!	#DIV/0!	#DIV/0!
	Fenite - I4 Illerfissalik	0.774063	0.270975	8.62282	0.297888	8.37654	15.5881	1.93409	7.24357		1.26888	24.1931	0.546612	0.208745	149.507	1.01013	0.132953	0.798368	4.1625	0.139164	0.418854	0.0551659	0.380428	0.0492378
	I4 Illerfissalik scaled for Ilim	1.38178	0.483718	15.3926	0.53176	14.953	27.8263	3.45254	12.9305		2.26508	43.1872	0.975759	0.372632	266.885	1.80318	0.237334	1.42517	7.4305	0.248421	0.747698	0.0984768	0.144814	0.0187429
	Fenite scaled for Ilim	0.294656	0.10315	3.28238	0.113394	3.18863	5.93378	0.736232	2.75735		0.483014	9.2094	0.208074	0.0794614	56.9115	0.384517	0.0506099	0.303908	1.58451	0.0529743	0.159442	0.0209995	0	0
	I4 raw + I4 fenite raw	18.6808	3.26648	66.9626	#DIV/0!	74.2905	171.259	#DIV/0!	80.0608		8.63436	334.795	#DIV/0!	#DIV/0!	5557.6	#DIV/0!	#DIV/0!	#DIV/0!	52.9819	#DIV/0!	#DIV/0!	#DIV/0!	0.525243	0.0679807
	Fenite MIN	0.294656	0.10315	3.28238	0.113394	3.18863	5.93378	0.736232	2.75735		0.483014	9.2094	0.208074	0.0794614	56.9115	0.384517	0.0506099	0.303908	1.58451	0.0529743	0.159442	0.0209995	0.144814	0.0187429
	Fenite MAX	1.8859	0.660195	21.0084	0.725764	20.4083	37.9783	4.71214	17.648		3.09146	58.9434	1.33175	0.50858	364.253	2.46105	0.323921	1.94512	10.1414	0.339054	1.02048	0.134404	0.926863	0.119961
	I4 scaled + I4 fenite scaled	1.67644	0.586868	18.675	0.645155	18.1416	33.7601	4.18877	15.6879		2.74809	52.3966	1.18383	0.452093	323.796	2.1877	0.287944	1.72908	9.015	0.301396	0.907139	0.119476
	Unaltered reference	0.2637	0.0440654	0.723397	0.140681	0.596666	1.12613	0.155948	0.677843		0.144118	13.3038	0.282552	0.0296314	37.7232	0.166868	0.0231179	0.145682	0.989167	0.0291973	0.0955998	0.0135073	0.0987975	0.0129845
	Unaltered MIN	0.187259	0.0312918	0.513699	0.0999008	0.423705	0.799685	0.110742	0.481351		0.102341	9.44729	0.200646	0.0210419	26.788	0.118497	0.0164165	0.103452	0.702428	0.0207336	0.0678874	0.00959183	0.0701581	0.00922053
	Unaltered MAX	0.354163	0.0591821	0.971558	0.188942	0.801353	1.51244	0.209446	0.910378		0.193558	17.8677	0.379482	0.0397964	50.6642	0.224113	0.0310485	0.195658	1.3285	0.0392134	0.128395	0.018141	0.13269	0.0174388
	Unaltered reference scaled	0.18626	0.0311248	0.510957	0.0993676	0.421444	0.795417	0.110151	0.478782		0.101795	9.39687	0.199575	0.0209295	26.6451	0.117864	0.0163289	0.102899	0.698679	0.0206229	0.0675251	0.00954063	#DIV/0!	#DIV/0!
	I4 error (1% Mt)	0.143254	0.0239641	0.466718	#DIV/0!	0.527311	1.24537	#DIV/0!	0.582538		0.0589238	2.48482	#DIV/0!	#DIV/0!	43.2648	#DIV/0!	#DIV/0!	#DIV/0!	0.390555	#DIV/0!	#DIV/0!	#DIV/0!	0.00347398	0.000449628
	Fenite error (1% Mt)	0.00706855	0.00247448	0.0787415	0.00272024	0.0764925	0.142347	0.0176616	0.0661465		0.0115871	0.220926	0.00499153	0.00190621	1.36526	0.00922425	0.00121409	0.00729051	0.038011	0.00127081	0.00382488	0.000503762	0.000935442	0.00012294
	Unaltered	0.00249679	0.000417224	0.00684932	0.00133201	0.0056494	0.0106625	0.00147656	0.00641801		0.00136455	0.125964	0.00267529	0.000280558	0.357174	0.00157996	0.000218887	0.00137935	0.00936571	0.000276448	0.000905166	0.000127891	0.380428	0.0492378
																							8.96089	1.48692
	Ilimaussaq	44.5521	29.0021	197.749	5.91493	478.722	689.678	7.85807	206.063		21.5424	1495.19	26.1176	1.7789	832.46	2.94503	3.2733	3.00263	210.398	0.524439	1.68852	0.26222	2.65197	0.376194
	Kakortokite	0.458472	0.834682	47.8031	2.05131	31.3898	59.0041	0.383771	22.8976		4.46681	580.535	11.2424	0.318208	96.2643	0.278736	0.819643	0.311529	32.4638	0.0655851	0.26234	0.0327925	3.94472	0.777229
	Lujavrite	43.3638	27.3544	105.07	2.27269	417.868	574.692	7.18398	160.673		12.7817	427.13	5.63252	1.12844	400.713	2.45543	1.68149	2.45543	148.569	0.409238	1.22772	0.204619
																							Yb2O3	Lu2O3
	Normalised to Ilimaussaq	ThO2	UO2	Nb2O5	Ta2O5	La2O3	Ce2O3	Pr2O3	Nd2O3	Pm2O3	Sm2O3	ZrO2	HfO2	Eu2O3	TiO2	Gd2O3	Tb2O3	Dy2O3	Y2O3	Ho2O3	Er2O3	Tm2O3	#REF!	#REF!
Ellip1	I4 Illerfissalik	0.401927	0.103286	0.29502	#DIV/0!	0.137687	0.225716	#DIV/0!	0.353374	#DIV/0!	0.341906	0.207735	#DIV/0!	#DIV/0!	6.49653	#DIV/0!	#DIV/0!	#DIV/0!	0.232034	#DIV/0!	#DIV/0!	#DIV/0!	0	0
	Fenite - I4 Illerfissalik	0.0173743	0.0093433	0.0436049	0.050362	0.0174977	0.022602	0.246127	0.0351522	#DIV/0!	0.0589014	0.0161807	0.0209289	0.117345	0.179596	0.342994	0.0406173	0.265889	0.019784	0.265357	0.24806	0.210381	0.0424543	0.0331138
	I4 Illerfissalik scaled for Ilim	0.031015	0.0166788	0.0778393	0.0899014	0.0312352	0.0403468	0.439362	0.0627503	#DIV/0!	0.105145	0.0288842	0.0373602	0.209473	0.320598	0.612279	0.072506	0.47464	0.0353165	0.47369	0.442813	0.375551	0.0161607	0.0126052
	Fenite scaled for Ilim	0.00661375	0.00355664	0.0165987	0.0191709	0.0066607	0.0086037	0.0936912	0.0133811	#DIV/0!	0.0224215	0.00615936	0.00796683	0.0446687	0.0683654	0.130565	0.0154614	0.101214	0.00753101	0.101011	0.094427	0.0800838	#REF!	#REF!
	I4 raw + I4 fenite raw	0.419302	0.112629	0.338625	#DIV/0!	0.155185	0.248318	#DIV/0!	0.388526	#DIV/0!	0.400807	0.223915	#DIV/0!	#DIV/0!	6.67612	#DIV/0!	#DIV/0!	#DIV/0!	0.251818	#DIV/0!	#DIV/0!	#DIV/0!	0.058615	0.045719
	I4 scaled + I4 fenite scaled	0.0376287	0.0202354	0.094438	0.109072	0.0378959	0.0489505	0.533054	0.0761314	#DIV/0!	0.127567	0.0350435	0.0453271	0.254142	0.388963	0.742844	0.0879675	0.575853	0.0428475	0.574701	0.53724	0.455635	0.0424543	0.0331138
	Unaltered reference	0.00591892	0.00151939	0.00365816	0.0237841	0.00124637	0.00163283	0.0198456	0.0032895	#DIV/0!	0.00668997	0.00889774	0.0108185	0.0166571	0.0453153	0.0566609	0.00706257	0.0485179	0.00470142	0.0556733	0.0566176	0.0515115	0.0110254	0.00873242
	Unaltered reference scaled	0.00418072	0.00107319	0.00258387	0.0167995	0.000880351	0.00115332	0.0140175	0.00232347	#DIV/0!	0.00472533	0.00628475	0.00764143	0.0117654	0.0320076	0.0400213	0.00498851	0.0342697	0.00332076	0.0393238	0.0399907	0.0363841
																							0.295949	0.253001
	Kakortokite	0.0102907	0.0287801	0.241736	0.346803	0.06557	0.0855532	0.0488378	0.11112	#DIV/0!	0.20735	0.38827	0.430455	0.178879	0.115638	0.0946463	0.250403	0.103752	0.154298	0.125058	0.155367	0.125058	0.440215	0.52271
	Lujavrite	0.973329	0.943187	0.53133	0.38423	0.872881	0.833276	0.914216	0.779728	#DIV/0!	0.593329	0.28567	0.21566	0.634348	0.48136	0.833753	0.513697	0.817759	0.706136	0.780335	0.727096	0.780335
[truncated: 4 more columns]

## Sheet: G49471
Sokół, K., et al., 2021, Quantifying metasomatic high-field-strength and rare-earth element transport from alkaline magmas: Geology, https://doi.org/10.1130/G49471.1
